# Supplementary material
Source: PubMed Central journal article supplement (PMC1308926)
Supplement: pnas_0509014102_1.pdf [file pnas_0509014102_1.pdf]

**Table 1. Real-time PCR primers**

| <b>Primer gene symbol</b> | <b>Primer sequence</b> | <b>Product size</b> |
|---------------------------|------------------------|---------------------|
| Snf5_F                    | acagtggagattgccatccg   | 133 bp              |
| Snf5_R                    | acgcctcattcgccttgtgt   |                     |
| Beta-Actin_F              | tcctgtggcatccatga      | 315 bp              |
| Beta-Actin_R              | gaagcacttgccggtgcacgat |                     |
| HoxA5_F                   | tgaagaagccctgttctcgt   | 244 bp              |
| HoxA5_R                   | gggggctttttgtgtgagta   |                     |
| Fmod_F                    | ctgcttctgcagttgctctg   | 158 bp              |
| Fmod_R                    | ggtgtgggtgtctctgact    |                     |
| Sostdc1_F                 | gccaggggtagttttgaaag   | 157 bp              |
| Sostdc1_R                 | acctattagctgctgccatga  |                     |
| MMP-13_F                  | cctggaattggcaacaaagta  | 238 bp              |
| MMP-13_R                  | gctctcccctgatatctccac  |                     |
| Fabp7_F                   | gctgggagaagagttgaagaa  | 243 bp              |
| Fabp7_R                   | gactccaggaaaccaagtgtc  |                     |
| Limhx2_F                  | attaaccacaatcccgatgc   | 120 bp              |
| Limhx2_R                  | taaaagggtgcgcctgaact   |                     |
| Tcfap2b_F                 | gggaaggcccaggtagtaaa   | 151 bp              |
| Tcfap2b_R                 | cctccaaagccaatccaata   |                     |
| Ly86_F                    | gttcccagaccaacagatg    | 141 bp              |
| Ly86_R                    | gttgctaaggagcaggcaag   |                     |
| Foxg1_F                   | ttctaacacggtgtggagtgtc | 135 bp              |
| Foxg1_R                   | ttgtcaggtttgaatgaaatgg |                     |
| p16_F                     | gtaccccgattcaggtgatg   | 101 bp              |
| p16_R                     | ggagaaggtagtggggctct   |                     |
| p19_F                     | gctctggcttctgtgaacat   | 136 bp              |
| p19_R                     | cgaatctgcaccgtagttga   |                     |
