# Supplementary material
Source: PubMed Central journal article supplement (PMC1308926)
Supplement: pnas_0509014102_2.pdf [file pnas_0509014102_2.pdf]

Table 2. Probes with greater than 1.5 fold change following Snf5 inactivation.

| Probe set    | Gene                                                   | Accession no. | LocusLink    | Fold change |
|--------------|--------------------------------------------------------|---------------|--------------|-------------|
| 1437591_a_at | WD repeat domain 1                                     | AW542545      | 22388        | 42.51       |
| 1421893_a_at | tripeptidyl peptidase II                               | BG066807      | 22019        | 38.07       |
| 1416617_at   | acetyl-Coenzyme A synthetase 2 (AMP forming)-lik       | NM_080575     | 68738        | 38          |
| 1431213_a_at | gb:BG297038 /DB_XREF=gi:13060290 /DB_XREF              | BG297038      |              | 15.36       |
| 1424459_at   | cDNA sequence BC005662                                 | BG068664      | 210992       | 14.21       |
| 1453724_a_at | serine (or cysteine) proteinase inhibitor, clade F, mε | AK012411      | 20317        | 10.94       |
| 1425725_s_at | Protein phosphatase 2, regulatory subunit B (B56),     | BF136532      | 26931        | 10.47       |
| 1421972_s_at | host cell factor C1                                    | NM_008224     | 15161        | 10.1        |
| 1422606_at   | C1q and tumor necrosis factor related protein 3        | NM_030888     | 81799        | 7.17        |
| 1430533_a_at | catenin beta                                           | BI134907      | 12387        | 6.92        |
| 1449939_s_at | delta-like 1 homolog (Drosophila)                      | NM_010052     | 13386        | 6.66        |
| 1420953_at   | adducin 1 (alpha)                                      | BF140063      | 11518        | 6.59        |
| 1416371_at   | apolipoprotein D                                       | NM_007470     | 11815        | 6.34        |
| 1456543_at   | G protein-coupled receptor 73                          | BB037474      | 58182        | 6.25        |
| 1450988_at   | G protein-coupled receptor 49                          | BB751088      | 14160        | 6.22        |
| 1455892_x_at | gb:BB794742 /DB_XREF=gi:16964361 /DB_XREF              | BB794742      |              | 5.79        |
| 1448201_at   | secreted frizzled-related sequence protein 2           | NM_009144     | 20319        | 5.68        |
| 1420549_at   | guanylate nucleotide binding protein 1                 | NM_010259     | 14468        | 5.51        |
| 1416573_at   | protein O-fucosyltransferase 2                         | BC018194      | 80294        | 5.2         |
| 1427520_a_at | myosin, heavy polypeptide 1, skeletal muscle, adult    | AJ293626      | 17879        | 5.13        |
| 1427038_at   | preproenkephalin 1                                     | M13227        | 18619        | 5.11        |
| 1432143_a_at | high mobility group box transcription factor 1         | AK006835      | 73389        | 5.01        |
| 1431645_a_at | guanosine diphosphate (GDP) dissociation inhibitor     | AK013104      | 14569        | 5           |
| 1422587_at   | transmembrane protein 45a                              | NM_019631     | 56277        | 4.92        |
| 1433491_at   | erythrocyte protein band 4.1-like 2                    | BE951907      | 13822        | 4.87        |
| 1456080_a_at | Tumor differentially expressed 1                       | BM239368      | 26943        | 4.85        |
| 1420924_at   | tissue inhibitor of metalloproteinase 2                | M93954        | 21858        | 4.73        |
| 1452899_at   | RNA imprinted and accumulated in nucleus               | AK017440      | 75745        | 4.62        |
| 1420855_at   | elastin                                                | BB229377      | 13717        | 4.52        |
| 1426027_a_at | Rho GTPase activating protein 10                       | AF297029      | 78514        | 4.51        |
| 1451777_at   | cDNA sequence BC013672                                 | BC013672      | 234311       | 4.45        |
| 1427868_x_at | myosin, heavy polypeptide 1, skeletal muscle, adult    | AJ002522      | 17879        | 4.41        |
| 1455869_at   | gb:BG862223 /DB_XREF=gi:14212761 /DB_XREF              | BG862223      |              | 4.39        |
| 1427565_a_at | ATP-binding cassette, sub-family C (CFTR/MRP), r       | AF213387      | 27416        | 4.35        |
| 1425326_at   | ATP citrate lyase                                      | BI456232      | 104112       | 4.28        |
| 1421604_a_at | Kruppel-like factor 3 (basic)                          | NM_008453     | 16599        | 4.26        |
| 1452907_at   | gb:AK010101.1 /DB_XREF=gi:12845310 /FEA=mF             | AK010101      |              | 4.26        |
| 1453196_a_at | 2'-5' oligoadenylate synthetase-like 2                 | BQ033138      | 23962        | 4.2         |
| 1430980_a_at | eukaryotic translation initiation factor 4A1           | BI656407      | 13681        | 4.18        |
| 1460187_at   | secreted frizzled-related sequence protein 1 /// RIK   | BI658627      | 20377 /// 72 | 4.17        |
| 1424041_s_at | complement component 1, s subcomponent                 | BC022123      | 50908        | 4           |
| 1437685_x_at | fibromodulin                                           | BB235530      | 14264        | 3.97        |
| 1451726_at   | myotubularin related protein 6                         | BC020019      | 219135       | 3.95        |
| 1438966_x_at | gb:AV290700 /DB_XREF=gi:6304731 /DB_XREF=,             | AV290700      |              | 3.91        |
| 1449551_at   | myosin IC                                              | NM_008659     | 17913        | 3.89        |
| 1460250_at   | sclerostin domain containing 1                         | BC021458      | 66042        | 3.85        |
| 1449340_at   | sclerostin domain containing 1                         | BC021458      | 66042        | 3.84        |
| 1415823_at   | gb:BB459479 /DB_XREF=gi:16426408 /DB_XREF              | BG060909      |              | 3.83        |
| 1416652_at   | asporin                                                | NM_025711     | 66695        | 3.71        |
| 1437324_x_at | fibromodulin                                           | BB504826      | 14264        | 3.65        |
| 1416515_at   | fascin homolog 1, actin bundling protein (Strongylo    | NM_007984     | 14086        | 3.61        |

|              |                                                                     |           |                 |      |
|--------------|---------------------------------------------------------------------|-----------|-----------------|------|
| 1423348_at   | frizzled homolog 8 (Drosophila)                                     | AV345166  | 14370           | 3.61 |
| 1415832_at   | angiotensin II receptor, type 2                                     | NM_007429 | 11609           | 3.51 |
| 1420899_at   | RAB18, member RAS oncogene family                                   | AW542340  | 19330           | 3.47 |
| 1450033_a_at | signal transducer and activator of transcription 1                  | AW214029  | 20846           | 3.45 |
| 1427054_s_at | RIKEN cDNA D930038M13 gene                                          | BC026627  | 320712          | 3.35 |
| 1456494_a_at | tripartite motif protein 30 /// tripartite motif protein 30         | BG068242  | 20128 /// 20128 | 3.34 |
| 1426439_at   | DEAD (Asp-Glu-Ala-Asp) box polypeptide 3, Y-linker                  | AA210261  | 26900           | 3.33 |
| 1437718_x_at | fibromodulin                                                        | BB483571  | 14264           | 3.31 |
| 1421816_at   | glutathione reductase 1                                             | AK019177  | 14782           | 3.3  |
| 1456084_x_at | fibromodulin                                                        | BB532202  | 14264           | 3.3  |
| 1417009_at   | complement component 1, r subcomponent                              | NM_023143 | 50909           | 3.27 |
| 1416572_at   | matrix metalloproteinase 14 (membrane-inserted)                     | NM_008608 | 17387           | 3.26 |
| 1423294_at   | mesoderm specific transcript                                        | AW555393  | 17294           | 3.26 |
| 1416318_at   | gb:AF426024.1 /DB_XREF=gi:18034363 /GEN=Seq                         | AF426024  |                 | 3.25 |
| 1451406_a_at | proprotein convertase subtilisin/kexin type 5                       | BC013068  | 18552           | 3.23 |
| 1426278_at   | interferon, alpha-inducible protein 27                              | AY090098  | 76933           | 3.22 |
| 1436713_s_at | GTL2, imprinted maternally expressed untranslated control           | BM119226  | 17263           | 3.21 |
| 1427053_at   | RIKEN cDNA D930038M13 gene                                          | BC026627  | 320712          | 3.18 |
| 1448380_at   | lectin, galactoside-binding, soluble, 3 binding protein             | NM_011150 | 19039           | 3.18 |
| 1426340_at   | solute carrier family 1 (glial high affinity glutamate transporter) | BB357585  | 20512           | 3.17 |
| 1451943_a_at | protein phosphatase 1A, magnesium dependent, alpha                  | AF259673  | 19042           | 3.16 |
| 1434357_a_at | karyopherin (importin) beta 1                                       | AW544889  | 16211           | 3.13 |
| 1416302_at   | early B-cell factor 1                                               | BB125261  | 13591           | 3.12 |
| 1426324_at   | MHC (A.CA/J(H-2K-f) class I antigen                                 | M33151    | 56628           | 3.1  |
| 1450655_at   | hect (homologous to the E6-AP (UBE3A) carboxyl terminal domain)     | AA214868  | 235439          | 3.1  |
| 1426852_x_at | nephroblastoma overexpressed gene                                   | X96585    | 18133           | 3.08 |
| 1425929_a_at | ring finger protein 14                                              | AF249668  | 56736           | 3.03 |
| 1460248_at   | carboxypeptidase X 2 (M14 family)                                   | AF017639  | 55987           | 3.03 |
| 1425329_a_at | diaphorase 1 (NADH)                                                 | AF332060  | 109754          | 3.02 |
| 1430514_a_at | RIKEN cDNA 2410026K10 gene                                          | AK002762  | 66478           | 3.02 |
| 1448127_at   | ribonucleotide reductase M1                                         | BB758819  | 20133           | 3.01 |
| 1450779_at   | fatty acid binding protein 7, brain                                 | NM_021272 | 12140           | 3.01 |
| 1418930_at   | chemokine (C-X-C motif) ligand 10                                   | NM_021274 | 15945           | 2.99 |
| 1450403_at   | signal transducer and activator of transcription 2                  | AF088862  | 20847           | 2.99 |
| 1450089_a_at | signal recognition particle receptor, B subunit                     | NM_009275 | 20818           | 2.96 |
| 1432466_a_at | apolipoprotein E                                                    | AK019319  | 11816           | 2.95 |
| 1416321_s_at | proline arginine-rich end leucine-rich repeat                       | NM_054077 | 116847          | 2.94 |
| 1452244_at   | RIKEN cDNA 6330406I15 gene                                          | AK018128  | 70717           | 2.93 |
| 1417716_at   | glutamate oxaloacetate transaminase 2, mitochondrial                | U82470    | 14719           | 2.9  |
| 1450783_at   | interferon-induced protein with tetratricopeptide repeats           | NM_008331 | 15957           | 2.9  |
| 1422450_at   | catenin src                                                         | NM_007615 | 12388           | 2.87 |
| 1425527_at   | paired related homeobox 1                                           | L06502    | 18933           | 2.87 |
| 1454159_a_at | insulin-like growth factor binding protein 2                        | AK011784  | 16008           | 2.87 |
| 1426937_at   | RIKEN cDNA 6330406I15 gene                                          | AK018128  | 70717           | 2.86 |
| 1427048_at   | smoothed homolog (Drosophila)                                       | AW555326  | 319757          | 2.84 |
| 1439260_a_at | ectonucleotide pyrophosphatase/phosphodiesterase 1                  | BB039510  | 209558          | 2.84 |
| 1448416_at   | matrix gamma-carboxyglutamate (gla) protein                         | NM_008597 | 17313           | 2.84 |
| 1432331_a_at | paired related homeobox 2                                           | AK019971  | 20204           | 2.81 |
| 1432478_a_at | IBR domain containing 3                                             | AK015966  | 75234           | 2.81 |
| 1421315_s_at | gb:BI688355 /DB_XREF=gi:15650984 /DB_XREF=                          | BI688355  |                 | 2.8  |
| 1419332_at   | EGF-like-domain, multiple 6                                         | NM_019397 | 54156           | 2.79 |
| 1420901_a_at | hexokinase 1                                                        | NM_010438 | 15275           | 2.78 |
| 1455061_a_at | acetyl-Coenzyme A acyltransferase 2 (mitochondrial)                 | BB718075  | 52538           | 2.78 |

|              |                                                                                   |           |              |      |
|--------------|-----------------------------------------------------------------------------------|-----------|--------------|------|
| 1419662_at   | osteoglycin                                                                       | BB542051  | 18295        | 2.77 |
| 1425911_a_at | fibroblast growth factor receptor 1                                               | M65053    | 14182        | 2.77 |
| 1450105_at   | a disintegrin and metalloprotease domain 10                                       | BG921598  | 11487        | 2.77 |
| 1425545_x_at | histocompatibility 2, D region                                                    | M86502    | 14980        | 2.76 |
| 1422781_at   | toll-like receptor 3                                                              | NM_126166 | 142980       | 2.75 |
| 1427580_a_at | RNA imprinted and accumulated in nucleus                                          | BB649603  | 75745        | 2.75 |
| 1425803_a_at | methyl-CpG binding domain protein 2                                               | AF072245  | 17191        | 2.74 |
| 1426438_at   | DEAD (Asp-Glu-Ala-Asp) box polypeptide 3, Y-linker                                | AA210261  | 26900        | 2.74 |
| 1448330_at   | glutathione S-transferase, mu 1                                                   | NM_010358 | 14862        | 2.74 |
| 1449082_at   | microfibrillar associated protein 5                                               | NM_015776 | 50530        | 2.72 |
| 1424948_x_at | histocompatibility 2, D region locus 1 /// histocompatibility 2, D region locus 1 | L23495    | 14964 /// 14 | 2.71 |
| 1451683_x_at | histocompatibility 2, D region locus 1 /// histocompatibility 2, D region locus 1 | M34962    | 14964 /// 14 | 2.71 |
| 1451784_x_at | histocompatibility 2, D region locus 1 /// histocompatibility 2, D region locus 1 | L36068    | 14964 /// 14 | 2.71 |
| 1424903_at   | jumonji, AT rich interactive domain 1D (Rbp2 like)                                | AF127244  | 20592        | 2.7  |
| 1417210_at   | eukaryotic translation initiation factor 2, subunit 3, small                      | NM_012011 | 26908        | 2.69 |
| 1432411_a_at | F-box and WD-40 domain protein 2                                                  | AK009893  | 30050        | 2.69 |
| 1422185_a_at | diaphorase 1 (NADH)                                                               | NM_029787 | 109754       | 2.68 |
| 1418317_at   | LIM homeobox protein 2                                                            | NM_010710 | 16870        | 2.67 |
| 1430692_a_at | Sel1 (suppressor of lin-12) 1 homolog (C. elegans)                                | AK005023  | 20338        | 2.67 |
| 1460279_a_at | general transcription factor II I                                                 | AF043219  | 14886        | 2.67 |
| 1427416_x_at | dual specificity phosphatase 7                                                    | BC025048  | 235584       | 2.66 |
| 1428492_at   | GLI pathogenesis-related 2                                                        | BM208214  | 384009       | 2.66 |
| 1417343_at   | FXYD domain-containing ion transport regulator 6                                  | AB032010  | 59095        | 2.65 |
| 1427746_x_at | histocompatibility 2, K1, K region                                                | S70184    | 14972        | 2.65 |
| 1454791_a_at | retinoblastoma binding protein 4                                                  | AU040918  | 19646        | 2.64 |
| 1421346_a_at | solute carrier family 6 (neurotransmitter transporter), member 6                  | NM_009320 | 21366        | 2.63 |
| 1451931_x_at | histocompatibility 2, D region locus 1 /// histocompatibility 2, D region locus 1 | M69068    | 14964 /// 14 | 2.63 |
| 1451939_a_at | sushi-repeat-containing protein                                                   | AB028050  | 51795        | 2.61 |
| 1431592_a_at | SH3-domain kinase binding protein 1                                               | AK007283  | 58194        | 2.6  |
| 1418532_at   | frizzled homolog 2 (Drosophila)                                                   | BB371406  | 57265        | 2.59 |
| 1419088_at   | tissue inhibitor of metalloproteinase 3                                           | BI111620  | 21859        | 2.59 |
| 1421813_a_at | prosaposin                                                                        | BM212050  | 19156        | 2.59 |
| 1425336_x_at | Histocompatibility 2, K1, K region                                                | BC011306  | 14972        | 2.59 |
| 1426598_at   | ubiquitously transcribed tetratricopeptide repeat gene 1                          | BB742957  | 22290        | 2.59 |
| 1420920_a_at | ADP-ribosylation factor 1                                                         | NM_007476 | 11840        | 2.58 |
| 1422631_at   | aryl-hydrocarbon receptor                                                         | BE989096  | 11622        | 2.58 |
| 1449556_at   | histocompatibility 2, T region locus 23 /// RIKEN cDNA 1500015O10                 | NM_010398 | 15040 /// 31 | 2.58 |
| 1450672_a_at | three prime repair exonuclease 1                                                  | NM_011637 | 22040        | 2.58 |
| 1423261_at   | RIKEN cDNA 1500015O10 gene                                                        | BB426248  | 78896        | 2.57 |
| 1452471_at   | interleukin 17 receptor D                                                         | AF459444  | 171463       | 2.56 |
| 1422903_at   | lymphocyte antigen 86                                                             | NM_010745 | 17084        | 2.54 |
| 1459546_s_at | ectonucleotide pyrophosphatase/phosphodiesterase 1                                | C76301    | 18605        | 2.54 |
| 1419089_at   | tissue inhibitor of metalloproteinase 3                                           | BI111620  | 21859        | 2.53 |
| 1416013_at   | phospholipase D3                                                                  | NM_011116 | 18807        | 2.52 |
| 1421217_a_at | lectin, galactose binding, soluble 9                                              | NM_010708 | 16859        | 2.52 |
| 1437932_a_at | claudin 1                                                                         | AV227581  | 12737        | 2.51 |
| 1422620_s_at | phosphatidic acid phosphatase 2a                                                  | NM_008903 | 19012        | 2.5  |
| 1424617_at   | interferon-induced protein 35                                                     | BC008158  | 70110        | 2.5  |
| 1426607_at   | MRNA similar to hypothetical protein FLJ21657 (cDNA)                              | BG068672  |              | 2.5  |
| 1422561_at   | a disintegrin-like and metalloprotease (reprolysin type) family 1 member 1        | BB658835  | 23794        | 2.48 |
| 1450429_at   | calpain 6                                                                         | AI747133  | 12338        | 2.47 |
| 1451782_a_at | solute carrier family 29 (nucleoside transporters), member 1                      | AF305501  | 63959        | 2.47 |
| 1416157_at   | vinculin                                                                          | NM_009502 | 22330        | 2.46 |

|              |                                                      |           |        |      |
|--------------|------------------------------------------------------|-----------|--------|------|
| 1426936_at   | cDNA sequence BC005512                               | BC002257  | 192885 | 2.46 |
| 1438676_at   | macrophage activation 2 like                         | BM241485  | 100702 | 2.46 |
| 1419561_at   | chemokine (C-C motif) ligand 3                       | NM_011337 | 20302  | 2.45 |
| 1451241_at   | laminin B1 subunit 1                                 | BG970109  | 16777  | 2.45 |
| 1416416_x_at | glutathione S-transferase, mu 1                      | NM_010358 | 14862  | 2.44 |
| 1448494_at   | growth arrest specific 1                             | BB550400  | 14451  | 2.44 |
| 1416066_at   | CD9 antigen                                          | NM_007657 | 12527  | 2.43 |
| 1417876_at   | Fc receptor, IgG, high affinity I                    | AF143181  | 14129  | 2.43 |
| 1421992_a_at | insulin-like growth factor binding protein 4         | NM_010517 | 16010  | 2.41 |
| 1427683_at   | early growth response 2                              | X06746    | 13654  | 2.41 |
| 1435176_a_at | inhibitor of DNA binding 2                           | BF019883  | 15902  | 2.41 |
| 1448908_at   | phosphatidic acid phosphatase type 2B                | NM_080555 | 67916  | 2.41 |
| 1449645_s_at | chaperonin subunit 3 (gamma)                         | AL024092  | 12462  | 2.41 |
| 1421058_at   | alcohol dehydrogenase 7 (class IV), mu or sigma p    | NM_009626 | 11529  | 2.4  |
| 1448842_at   | cysteine dioxygenase 1, cytosolic                    | NM_033037 | 12583  | 2.4  |
| 1450377_at   | thrombospondin 1                                     | AI385532  | 21825  | 2.4  |
| 1421313_s_at | cortactin                                            | BI688355  | 13043  | 2.39 |
| 1424807_at   | laminin, alpha 4                                     | BB053010  | 16775  | 2.39 |
| 1431744_a_at | stromal membrane-associated protein 1                | AK014888  | 98366  | 2.39 |
| 1433685_a_at | RIKEN cDNA 6430706D22 gene                           | BM248225  | 381280 | 2.39 |
| 1435637_at   | DNA segment, Chr 8, Wayne State University 49, e     | AW554709  | 71927  | 2.39 |
| 1449335_at   | tissue inhibitor of metalloproteinase 3              | BI111620  | 21859  | 2.39 |
| 1454011_a_at | replication protein A2                               | AK011530  | 19891  | 2.39 |
| 1426851_a_at | nephroblastoma overexpressed gene                    | X96585    | 18133  | 2.38 |
| 1431420_s_at | RIKEN cDNA 2610524G07 gene                           | BI082843  | 66494  | 2.38 |
| 1416855_at   | growth arrest specific 1                             | BB550400  | 14451  | 2.37 |
| 1453556_x_at | RIKEN cDNA 2410026K10 gene                           | AK002762  | 66478  | 2.37 |
| 1424010_at   | microfibrillar-associated protein 4                  | BC022666  | 76293  | 2.35 |
| 1436372_a_at | expressed sequence AA415817                          | BB026304  | 94184  | 2.35 |
| 1453651_a_at | brain protein 44-like                                | AV223468  | 55951  | 2.35 |
| 1423053_at   | ADP-ribosylation factor 4                            | BI653265  | 11843  | 2.34 |
| 1448601_s_at | homeo box, msh-like 1                                | BC016426  | 17701  | 2.34 |
| 1451413_at   | calpastatin                                          | AB026997  | 12380  | 2.34 |
| 1433446_at   | 3-hydroxy-3-methylglutaryl-Coenzyme A synthase 1     | BB705380  | 208715 | 2.33 |
| 1417127_at   | homeo box, msh-like 1                                | BC016426  | 17701  | 2.32 |
| 1417455_at   | transforming growth factor, beta 3                   | BC014690  | 21809  | 2.32 |
| 1425942_a_at | glycoprotein m6b                                     | AF254879  | 14758  | 2.32 |
| 1450008_a_at | catenin beta                                         | NM_007614 | 12387  | 2.32 |
| 1415982_at   | RIKEN cDNA 5031400M07 gene                           | AV258950  | 80517  | 2.3  |
| 1420814_at   | guanosine diphosphate (GDP) dissociation inhibitor   | NM_008112 | 14569  | 2.3  |
| 1424596_s_at | LIM and cysteine-rich domains 1                      | BC019124  | 30937  | 2.3  |
| 1450007_at   | RIKEN cDNA 1500003O03 gene                           | NM_019769 | 56398  | 2.3  |
| 1426758_s_at | GTL2, imprinted maternally expressed untranslated c  | Y13832    | 17263  | 2.29 |
| 1417063_at   | complement component 1, q subcomponent, beta c       | NM_009777 | 12260  | 2.28 |
| 1417381_at   | complement component 1, q subcomponent, alpha        | NM_007572 | 12259  | 2.28 |
| 1448228_at   | lysyl oxidase                                        | M65143    | 16948  | 2.28 |
| 1416800_at   | transient receptor potential cation channel, subfam  | AV320241  | 58800  | 2.26 |
| 1419636_at   | RIKEN cDNA 4833420G17 gene                           | BG067119  | 67392  | 2.26 |
| 1421917_at   | platelet derived growth factor receptor, alpha polyp | AW537708  | 18595  | 2.26 |
| 1427773_a_at | Rab acceptor 1 (prenylated)                          | L40934    | 14470  | 2.26 |
| 1449207_a_at | kinesin family member 20A                            | NM_009004 | 19348  | 2.26 |
| 1418454_at   | microfibrillar associated protein 5                  | NM_015776 | 50530  | 2.25 |
| 1449164_at   | CD68 antigen                                         | BC021637  | 12514  | 2.25 |

|              |                                                                          |           |        |      |
|--------------|--------------------------------------------------------------------------|-----------|--------|------|
| 1453321_at   | fibronectin type III domain containing 1                                 | AK003938  | 68655  | 2.25 |
| 1453836_a_at | monoglyceride lipase                                                     | AK006949  | 23945  | 2.25 |
| 1419043_a_at | interferon inducible GTPase 1                                            | BM239828  | 60440  | 2.24 |
| 1421433_at   | zinc finger homeodomain 4                                                | NM_030708 | 80892  | 2.24 |
| 1423045_at   | nuclear cap binding protein subunit 2                                    | BE285362  | 68092  | 2.24 |
| 1448475_at   | olfactomedin-like 3                                                      | NM_133859 | 99543  | 2.24 |
| 1448732_at   | cathepsin B                                                              | M14222    | 13030  | 2.24 |
| 1450040_at   | tissue inhibitor of metalloproteinase 2                                  | M93954    | 21858  | 2.24 |
| 1419482_at   | complement component 3a receptor 1                                       | NM_009779 | 12267  | 2.23 |
| 1424895_at   | G-protein signalling modulator 2 (AGS3-like, C. ele                      | BC021308  | 76123  | 2.23 |
| 1427091_at   | expressed sequence AI481105                                              | BC025488  | 98999  | 2.23 |
| 1431081_a_at | phospholipid scramblase 3                                                | AK011716  | 70310  | 2.23 |
| 1423379_at   | nuclear factor of activated T-cells, cytoplasmic, calc                   | BF227641  | 73181  | 2.22 |
| 1423890_x_at | ATPase, Na <sup>+</sup> /K <sup>+</sup> transporting, beta 1 polypeptide | BC027319  | 11931  | 2.22 |
| 1448218_s_at | tyrosine 3-monooxygenase/tryptophan 5-monooxyc                           | AV027921  | 22631  | 2.22 |
| 1418796_at   | C-type lectin domain family 11, member a                                 | NM_009131 | 20256  | 2.21 |
| 1448293_at   | early B-cell factor 1                                                    | BB125261  | 13591  | 2.21 |
| 1453307_a_at | anaphase-promoting complex subunit 5                                     | AK003821  | 59008  | 2.21 |
| 1417979_at   | tenomodulin                                                              | AF291655  | 64103  | 2.2  |
| 1427301_at   | CD48 antigen                                                             | BE634960  | 12506  | 2.2  |
| 1438661_a_at | ADP-ribosylation factor 2                                                | AV023312  | 11841  | 2.2  |
| 1426869_at   | biregional cell adhesion molecule-related/down-reg                       | BB005556  | 117606 | 2.19 |
| 1434370_s_at | Fas-associated factor 1                                                  | AV016515  | 14084  | 2.19 |
| 1420612_s_at | protein tyrosine phosphatase 4a2                                         | BE134116  | 19244  | 2.18 |
| 1426680_at   | selenoprotein N, 1                                                       | AK003819  | 74777  | 2.17 |
| 1448958_at   | interferon alpha responsive gene                                         | NM_022329 | 64164  | 2.17 |
| 1451897_a_at | neighbor of Brca1 gene 1                                                 | AF227188  | 17966  | 2.17 |
| 1452430_s_at | splicing factor, arginine/serine-rich 1 (ASF/SF2)                        | X66091    | 110809 | 2.17 |
| 1455961_at   | Membrane metallo endopeptidase                                           | AV174022  | 17380  | 2.17 |
| 1417570_at   | anaphase promoting complex subunit 1                                     | NM_008569 | 17222  | 2.16 |
| 1452398_at   | phospholipase C, epsilon 1                                               | AV306884  | 74055  | 2.16 |
| 1416513_at   | laminin, beta 2                                                          | BC026051  | 16779  | 2.15 |
| 1418541_at   | RIKEN cDNA 2810429O05 gene                                               | NM_134046 | 52504  | 2.15 |
| 1423549_at   | solute carrier family 1 (glutamate/neutral amino aci                     | BB277461  | 55963  | 2.15 |
| 1418457_at   | chemokine (C-X-C motif) ligand 14                                        | AF252873  | 57266  | 2.14 |
| 1419066_at   | immediate early response 5-like                                          | NM_030244 | 72500  | 2.14 |
| 1419442_at   | matrilin 2                                                               | BC005429  | 17181  | 2.14 |
| 1430388_a_at | sulfatase 2                                                              | AK008108  | 72043  | 2.13 |
| 1450932_s_at | dedicator of cytokinesis 9                                               | BB795072  | 105445 | 2.13 |
| 1416072_at   | CD34 antigen                                                             | NM_133654 | 12490  | 2.12 |
| 1418126_at   | gb:NM_013653.1 /DB_XREF=gi:7305460 /GEN=Sc                               | NM_013653 |        | 2.12 |
| 1423062_at   | gb:AV175389 /DB_XREF=gi:16384293 /DB_XREF:                               | AV175389  |        | 2.12 |
| 1423978_at   | SH3-binding kinase 1                                                     | BC025837  | 104175 | 2.12 |
| 1451152_a_at | ATPase, Na <sup>+</sup> /K <sup>+</sup> transporting, beta 1 polypeptide | BC027319  | 11931  | 2.12 |
| 1451289_at   | Double cortin and calcium/calmodulin-dependent pi                        | AW105916  | 13175  | 2.12 |
| 1423607_at   | lumican                                                                  | AK014312  | 17022  | 2.11 |
| 1423627_at   | NAD(P)H dehydrogenase, quinone 1                                         | AV158882  | 18104  | 2.11 |
| 1427692_a_at | calcium/calmodulin-dependent serine protein kinas                        | Y17137    | 12361  | 2.11 |
| 1437626_at   | zinc finger protein 36, C3H type-like 2                                  | BB031791  | 12193  | 2.11 |
| 1419015_at   | WNT1 inducible signaling pathway protein 2                               | NM_016873 | 22403  | 2.1  |
| 1427314_at   | transmembrane emp24 protein transport domain cc                          | AV225029  | 66676  | 2.1  |
| 1434748_at   | cytoskeleton associated protein 2                                        | BM208103  | 80986  | 2.1  |
| 1448754_at   | retinol binding protein 1, cellular                                      | NM_011254 | 19659  | 2.1  |

|              |                                                          |           |              |      |
|--------------|----------------------------------------------------------|-----------|--------------|------|
| 1450170_x_at | histocompatibility 2, D region locus 1 /// histocompat   | NM_010380 | 14964 /// 14 | 2.1  |
| 1418020_s_at | carboxypeptidase D                                       | NM_007754 | 12874        | 2.09 |
| 1429514_at   | phosphatidic acid phosphatase type 2B                    | AW111876  | 67916        | 2.09 |
| 1451884_a_at | LSM2 homolog, U6 small nuclear RNA associated (          | AF204156  | 27756        | 2.09 |
| 1452997_at   | RIKEN cDNA 2610005L07 gene                               | BE692399  | 381598       | 2.09 |
| 1427567_a_at | tropomyosin 3, gamma                                     | BE380713  | 59069        | 2.08 |
| 1427831_s_at | zinc finger protein 260                                  | L36316    | 26466        | 2.08 |
| 1456386_at   | RIKEN cDNA B330012G18 gene                               | BB203348  | 170791       | 2.08 |
| 1417595_at   | mesenchyme homeobox 1                                    | NM_010791 | 17285        | 2.07 |
| 1424271_at   | double cortin and calcium/calmodulin-dependent pr        | AW105916  | 13175        | 2.07 |
| 1424339_at   | 2'-5' oligoadenylate synthetase-like 1                   | AB067533  | 231655       | 2.07 |
| 1448613_at   | extracellular matrix protein 1                           | NM_007899 | 13601        | 2.07 |
| 1449928_at   | t-complex-associated-testis-expressed 1-like             | NM_025975 | 67117        | 2.07 |
| 1454953_at   | Ring finger protein 157                                  | BB246182  | 217340       | 2.07 |
| 1449401_at   | complement component 1, q subcomponent, gamr             | NM_007574 | 12262        | 2.06 |
| 1451335_at   | placenta-specific 8                                      | AF263458  | 231507       | 2.06 |
| 1417462_at   | CAP, adenylate cyclase-associated protein 1 (yeast)      | NM_007598 | 12331        | 2.05 |
| 1421871_at   | SH3-binding domain glutamic acid-rich protein like       | NM_019989 | 56726        | 2.05 |
| 1451912_a_at | fibroblast growth factor receptor-like 1                 | AF321301  | 116701       | 2.05 |
| 1452432_at   | tissue factor pathway inhibitor                          | BF451808  | 21788        | 2.05 |
| 1455868_a_at | tubulin, gamma complex associated protein 2              | BB387906  | 74237        | 2.05 |
| 1415945_at   | minichromosome maintenance deficient 5, cell divis       | NM_008566 | 17218        | 2.04 |
| 1418204_s_at | allograft inflammatory factor 1                          | NM_019467 | 11629        | 2.04 |
| 1435129_at   | gb:AW495875 /DB_XREF=gi:7066156 /DB_XREF= AW495875       |           |              | 2.04 |
| 1450291_s_at | gb:NM_022429.1 /DB_XREF=gi:11967954 /GEN=N               | NM_022429 |              | 2.04 |
| 1460549_a_at | CDC23 (cell division cycle 23, yeast, homolog)           | BB492440  | 52563        | 2.04 |
| 1416239_at   | argininosuccinate synthetase 1                           | NM_007494 | 11898        | 2.03 |
| 1418078_at   | proteasome (prosome, macropain) 28 subunit, 3            | U60330    | 19192        | 2.03 |
| 1419042_at   | interferon inducible GTPase 1                            | BM239828  | 60440        | 2.03 |
| 1426734_at   | cDNA sequence BC022623                                   | BB008324  | 224093       | 2.03 |
| 1416459_at   | ADP-ribosylation factor 2                                | NM_007477 | 11841        | 2.02 |
| 1421812_at   | gb:AK014566.1 /DB_XREF=gi:12852498 /GEN=Ta               | AF043943  |              | 2.02 |
| 1422962_a_at | proteasome (prosome, macropain) subunit, beta ty         | NM_010724 | 16913        | 2.02 |
| 1425373_a_at | tumor necrosis factor superfamily, member 5-induc        | BC016606  | 107047       | 2.02 |
| 1427126_at   | heat shock protein 1B                                    | M12573    | 15511        | 2.02 |
| 1428380_at   | RIKEN cDNA 0610007C21 gene                               | AK002276  | 381629       | 2.02 |
| 1452925_a_at | membrane-associated ring finger (C3HC4) 5                | AK009364  | 69104        | 2.02 |
| 1417756_a_at | lymphocyte specific 1                                    | NM_019391 | 16985        | 2.01 |
| 1426998_at   | testis expressed gene 27                                 | BG976649  | 21769        | 2.01 |
| 1451860_a_at | tripartite motif protein 30                              | AF220015  | 20128        | 2.01 |
| 1452031_at   | solute carrier family 1 (glial high affinity glutamate t | BB357585  | 20512        | 2.01 |
| 1460295_s_at | interleukin 6 signal transducer                          | AA717838  | 16195        | 2.01 |
| 1460331_at   | transmembrane 9 superfamily member 2                     | BB747462  | 68059        | 2.01 |
| 1416467_at   | DEAD/H (Asp-Glu-Ala-Asp/His) box polypeptide 3,          | L25126    | 13205        | 2    |
| 1420828_s_at | tyrosine 3-monooxygenase/tryptophan 5-monooxyc           | NM_011739 | 22630        | 2    |
| 1425896_a_at | fibrillin 1                                              | AF007248  | 14118        | 2    |
| 1429681_a_at | glycoprotein, synaptic 2                                 | AK020708  | 106529       | 2    |
| 1438887_a_at | germ cell-less homolog (Drosophila)                      | BM239632  | 23885        | 2    |
| 1451236_at   | RAS-like, estrogen-regulated, growth-inhibitor           | BC026463  | 232441       | 2    |
| 1451832_at   | chemokine-like factor                                    | AF401530  | 75458        | 2    |
| 1428257_s_at | dynein, cytoplasmic, light chain 2A                      | BG791323  | 67068        | 1.99 |
| 1417501_at   | F-box only protein 6b                                    | NM_015797 | 50762        | 1.98 |
| 1417793_at   | interferon inducible GTPase 2                            | NM_019440 | 54396        | 1.98 |

|              |                                                        |           |              |      |
|--------------|--------------------------------------------------------|-----------|--------------|------|
| 1418819_at   | ADP-ribosylation factor-like 10C                       | NM_026011 | 67166        | 1.98 |
| 1418985_at   | cDNA sequence BC003236                                 | NM_030249 | 80281        | 1.98 |
| 1423263_at   | H3 histone, family 3A                                  | BI111967  | 15078        | 1.98 |
| 1423368_at   | lysosomal-associated protein transmembrane 4A          | BI695636  | 17775        | 1.98 |
| 1423771_at   | protein kinase C, delta binding protein                | BC009660  | 109042       | 1.98 |
| 1424234_s_at | mesenchyme homeobox 2                                  | BC002076  | 17286        | 1.98 |
| 1416030_a_at | minichromosome maintenance deficient 7 (S. cerevisiae) | NM_008568 | 17220        | 1.97 |
| 1456393_at   | RIKEN cDNA 2310002J21 gene                             | AI642124  | 66360        | 1.97 |
| 1418369_at   | DNA primase, p49 subunit                               | J04620    | 19075        | 1.96 |
| 1420841_at   | protein tyrosine phosphatase, receptor type, F         | BF235516  | 19268        | 1.96 |
| 1422264_s_at | basic transcription element binding protein 1          | NM_010638 | 16601        | 1.96 |
| 1426260_a_at | UDP-glucuronosyltransferase 1 family, member 2 //      | D87867    | 22236 /// 35 | 1.96 |
| 1429534_a_at | inner membrane protein, mitochondrial                  | BB222675  | 76614        | 1.96 |
| 1431746_a_at | ubiquitin-activating enzyme E1C                        | AK014433  | 22200        | 1.96 |
| 1448620_at   | Fc receptor, IgG, low affinity III                     | NM_010188 | 14131        | 1.96 |
| 1451987_at   | arrestin, beta 2                                       | BC016642  | 216869       | 1.96 |
| 1454875_a_at | retinoblastoma binding protein 4                       | BF011461  | 19646        | 1.96 |
| 1415677_at   | dehydrogenase/reductase (SDR family) member 1          | NM_026819 | 52585        | 1.95 |
| 1418698_a_at | ferrochelatase                                         | NM_007998 | 14151        | 1.95 |
| 1426781_at   | radical S-adenosyl methionine and flavodoxin domain    | BF021045  | 100929       | 1.95 |
| 1427552_a_at | glutathione transferase zeta 1 (maleylacetoacetate     | AB041613  | 14874        | 1.95 |
| 1431295_a_at | syntaxin 18                                            | AK016910  | 71116        | 1.95 |
| 1449060_at   | kinesin family member 2C                               | NM_134471 | 73804        | 1.95 |
| 1417926_at   | RIKEN cDNA 5830426I05 gene                             | NM_133762 | 76044        | 1.94 |
| 1423916_s_at | myeloid leukemia factor 2                              | BC003975  | 30853        | 1.94 |
| 1429252_at   | gb:AK002491.1 /DB_XREF=gi:12832513 /FEA=mF             | AK002491  |              | 1.94 |
| 1431827_a_at | tousled-like kinase 2 (Arabidopsis)                    | AK014829  | 24086        | 1.94 |
| 1450112_a_at | growth arrest specific 2                               | NM_008087 | 14453        | 1.94 |
| 1452920_a_at | peptidylprolyl isomerase (cyclophilin)-like 2          | AK009460  | 66053        | 1.94 |
| 1422034_a_at | paralemmin                                             | NM_023128 | 18483        | 1.93 |
| 1422414_a_at | calmodulin 2                                           | NM_007589 | 12314        | 1.93 |
| 1423675_at   | ubiquitin specific protease 1                          | BC018179  | 230484       | 1.93 |
| 1425764_a_at | branched chain aminotransferase 2, mitochondrial       | AF031467  | 12036        | 1.93 |
| 1427132_at   | myotubularin related protein 13                        | BG242242  | 319934       | 1.93 |
| 1428922_at   | RIKEN cDNA 1200009O22 gene                             | AK004681  | 66873        | 1.93 |
| 1450388_s_at | twisted gastrulation homolog 1 (Drosophila)            | BC004850  | 65960        | 1.93 |
| 1420307_a_at | phosphatidylinositol transfer protein, beta            | BG975479  | 56305        | 1.92 |
| 1433805_at   | Janus kinase 1                                         | BQ032637  | 16451        | 1.92 |
| 1448749_at   | pleckstrin                                             | AF181829  | 56193        | 1.92 |
| 1451285_at   | fusion, derived from t(12;16) malignant liposarcoma    | AF224264  | 233908       | 1.92 |
| 1455480_s_at | ubiquitin-conjugating enzyme E2D 3 (UBC4/5 homologue)  | BG070759  | 66105        | 1.92 |
| 1460694_s_at | supervillin                                            | BM203457  | 225115       | 1.92 |
| 1417961_a_at | tripartite motif protein 30                            | BM240719  | 20128        | 1.91 |
| 1425351_at   | neoplastic progression 3                               | BC011325  | 76650        | 1.91 |
| 1450678_at   | gb:NM_008404.1 /DB_XREF=gi:6680489 /GEN=Itc            | NM_008404 |              | 1.91 |
| 1454699_at   | Sestrin 1                                              | BG076140  | 140742       | 1.91 |
| 1419554_at   | CD47 antigen (Rh-related antigen, integrin-associated  | NM_010581 | 16423        | 1.9  |
| 1438759_x_at | gb:AU046270 /DB_XREF=gi:3982453 /DB_XREF=              | AU046270  |              | 1.9  |
| 1448460_at   | activin A receptor, type 1                             | NM_007394 | 11477        | 1.9  |
| 1450776_at   | expressed sequence AU041707                            | NM_018743 | 102247       | 1.9  |
| 1456616_a_at | basigin                                                | AV035166  | 12215        | 1.9  |
| 1419276_at   | ectonucleotide pyrophosphatase/phosphodiesterase       | AF339910  | 18605        | 1.89 |
| 1420915_at   | signal transducer and activator of transcription 1     | AW214029  | 20846        | 1.89 |

|              |                                                       |           |        |      |
|--------------|-------------------------------------------------------|-----------|--------|------|
| 1421491_a_at | RIKEN cDNA 4930579A11 gene                            | NM_029478 | 75909  | 1.89 |
| 1428500_at   | RIKEN cDNA 2210419D22 gene                            | AK008985  | 73661  | 1.89 |
| 1451426_at   | DNA segment, Chr 11, Lothar Hennighausen 2, ex        | AF316999  | 80861  | 1.89 |
| 1452429_s_at | ATP-binding cassette, sub-family F (GCN20), mem       | BF236176  | 224742 | 1.89 |
| 1422062_at   | macrophage scavenger receptor 1                       | BC003814  | 20288  | 1.88 |
| 1434877_at   | neuronal pentraxin 1                                  | AI152800  | 18164  | 1.88 |
| 1448972_at   | glutamate receptor, ionotropic, AMPA1 (alpha 1)       | NM_008165 | 14799  | 1.88 |
| 1452077_at   | DEAD (Asp-Glu-Ala-Asp) box polypeptide 3, Y-link      | AA210261  | 26900  | 1.88 |
| 1417133_at   | peripheral myelin protein                             | NM_008885 | 18858  | 1.87 |
| 1423746_at   | thioredoxin domain containing 5                       | BC016252  | 105245 | 1.87 |
| 1428707_at   | RIKEN cDNA 2610009E16 gene                            | AK011360  | 69202  | 1.87 |
| 1431686_a_at | glia maturation factor, beta                          | AK013970  | 63985  | 1.87 |
| 1448590_at   | procollagen, type VI, alpha 1                         | NM_009933 | 12833  | 1.87 |
| 1451538_at   | gb:BC024958.1 /DB_XREF=gi:19353855 /FEA=FL            | BC024958  |        | 1.87 |
| 1416623_at   | thrombospondin 3                                      | NM_013691 | 21827  | 1.86 |
| 1416625_at   | serine (or cysteine) proteinase inhibitor, clade G, m | NM_009776 | 12258  | 1.86 |
| 1417359_at   | microfibrillar-associated protein 2                   | NM_008546 | 17150  | 1.86 |
| 1417439_at   | CD248 antigen, endosialin                             | NM_054042 | 70445  | 1.86 |
| 1419569_a_at | interferon-stimulated protein                         | BC022751  | 57444  | 1.86 |
| 1420671_x_at | membrane-spanning 4-domains, subfamily A, mem         | NM_029499 | 64380  | 1.86 |
| 1423077_at   | sorting nexin 9                                       | BB703513  | 66616  | 1.86 |
| 1424956_at   | RIKEN cDNA D030015G18 gene                            | BC019130  | 230793 | 1.86 |
| 1425039_at   | integrin, beta-like 1                                 | BC020152  | 223272 | 1.86 |
| 1427027_a_at | general transcription factor III A                    | AV173739  | 66596  | 1.86 |
| 1431105_a_at | transmembrane protein 33                              | AK012413  | 67878  | 1.86 |
| 1434881_s_at | potassium channel tetramerisation domain containi     | BM220945  | 239217 | 1.86 |
| 1436038_a_at | Down syndrome critical region homolog 5 (human)       | BF318238  | 56176  | 1.86 |
| 1439064_at   | cDNA sequence BC030046                                | AV233866  | 277154 | 1.86 |
| 1451074_at   | gb:AF037205.1 /DB_XREF=gi:2746334 /GEN=Rzf            | AF037205  |        | 1.86 |
| 1415756_a_at | SNAP-associated protein                               | BB667523  | 20615  | 1.85 |
| 1417298_at   | emopamil binding protein-like                         | BC027422  | 68177  | 1.85 |
| 1420817_at   | 3-monooxygenase/tryptophan 5-monooxygenase acti       | NM_018871 | 22628  | 1.85 |
| 1421596_s_at | histocompatibility 28                                 | NM_031367 | 15061  | 1.85 |
| 1423041_a_at | basic leucine zipper and W2 domains 1                 | AV144956  | 66882  | 1.85 |
| 1429144_at   | RIKEN cDNA 2310032D16 gene                            | AV291259  | 74182  | 1.85 |
| 1438398_at   | RIKEN cDNA B330012G18 gene                            | BB203348  | 170791 | 1.85 |
| 1452782_a_at | thioredoxin 2                                         | AK002358  | 56551  | 1.85 |
| 1416942_at   | type 1 tumor necrosis factor receptor shedding ami    | NM_030711 | 80898  | 1.84 |
| 1417442_a_at | peroxisomal biogenesis factor 3                       | AK012827  | 56535  | 1.84 |
| 1426312_at   | brain and reproductive organ-expressed protein        | BE984258  | 107976 | 1.84 |
| 1429246_a_at | annexin A6                                            | AK013026  | 11749  | 1.84 |
| 1448865_at   | hydroxysteroid (17-beta) dehydrogenase 7              | NM_010476 | 15490  | 1.84 |
| 1449299_at   | low density lipoprotein receptor-related protein 5    | BC011374  | 16973  | 1.84 |
| 1419586_at   | retinitis pigmentosa 2 homolog (human)                | BF168611  | 19889  | 1.83 |
| 1423331_a_at | poliovirus receptor-related 3                         | BG070704  | 58998  | 1.83 |
| 1424180_a_at | thyroid hormone receptor associated protein 4         | BC005409  | 23989  | 1.83 |
| 1424775_at   | 2'-5' oligoadenylate synthetase 1A                    | BC018470  | 246730 | 1.83 |
| 1426774_at   | gb:BM227980 /DB_XREF=gi:17790458 /DB_XREF             | BM227980  |        | 1.83 |
| 1428708_x_at | RIKEN cDNA 2610009E16 gene                            | AK011360  | 69202  | 1.83 |
| 1448332_at   | peroxisome biogenesis factor 19                       | NM_023041 | 19298  | 1.83 |
| 1448384_at   | gb:BC018194.1 /DB_XREF=gi:17390433 /FEA=FL            | BC018194  |        | 1.83 |
| 1415935_at   | SPARC related modular calcium binding 2               | NM_022315 | 64074  | 1.82 |
| 1416319_at   | adenosine kinase                                      | NM_134079 | 11534  | 1.82 |



|              |                                                       |           |              |      |
|--------------|-------------------------------------------------------|-----------|--------------|------|
| 1417753_at   | polycystic kidney disease 2                           | AF014010  | 18764        | 1.82 |
| 1417821_at   | DNA segment, Chr 17, human D6S56E 5                   | NM_033075 | 110956       | 1.82 |
| 1419483_at   | complement component 3a receptor 1                    | NM_009779 | 12267        | 1.82 |
| 1421063_s_at | small nuclear ribonucleoprotein N /// SNRPN upstre    | NM_033174 | 20646 /// 84 | 1.82 |
| 1423545_a_at | zinc finger protein 207                               | BB633247  | 22680        | 1.82 |
| 1429859_a_at | ADP-ribosylation factor-like 2 binding protein        | AK006418  | 107566       | 1.82 |
| 1448235_s_at | high mobility group box 1 /// RIKEN cDNA 4932431      | BF166000  | 114675 /// 1 | 1.82 |
| 1451789_a_at | receptor-like tyrosine kinase                         | M98547    | 20187        | 1.82 |
| 1416213_x_at | surfeit gene 4                                        | BF122782  | 20932        | 1.81 |
| 1416897_at   | poly (ADP-ribose) polymerase family, member 9         | NM_030253 | 80285        | 1.81 |
| 1418536_at   | Histocompatibility 2, Q region locus 6                | M29881    | 15018        | 1.81 |
| 1422782_s_at | toll-like receptor 3                                  | NM_126166 | 142980       | 1.81 |
| 1423840_at   | DNA segment, Chr 11, ERATO Doi 99, expressed          | BC026206  | 52469        | 1.81 |
| 1426830_a_at | S-adenosylhomocysteine hydrolase-like 1               | BB831090  | 229709       | 1.81 |
| 1426947_x_at | procollagen, type VI, alpha 2                         | BI455189  | 12834        | 1.81 |
| 1427682_a_at | early growth response 2                               | X06746    | 13654        | 1.81 |
| 1448591_at   | cathepsin S                                           | NM_021281 | 13040        | 1.81 |
| 1449018_at   | profilin 1                                            | NM_011072 | 18643        | 1.81 |
| 1424007_at   | growth differentiation factor 10                      | L42114    | 14560        | 1.8  |
| 1424874_a_at | polypyrimidine tract binding protein 1                | BC007472  | 19205        | 1.8  |
| 1426880_at   | CDNA sequence BC026657                                | BM250266  | 208618       | 1.8  |
| 1450716_at   | a disintegrin-like and metalloprotease (reprolysin ty | D67076    | 11504        | 1.8  |
| 1452037_at   | mannoside acetylglucosaminyltransferase 2             | AI481328  | 217664       | 1.8  |
| 1452426_x_at | gb:BC004065.1 /DB_XREF=gi:13278542 /FEA=mF            | BC004065  |              | 1.8  |
| 1416619_at   | RIKEN cDNA 4632428N05 gene                            | BC003967  | 74048        | 1.79 |
| 1418666_at   | pentaxin related gene                                 | NM_008987 | 19288        | 1.79 |
| 1419037_at   | casein kinase II, alpha 1 polypeptide                 | BB283759  | 12995        | 1.79 |
| 1423259_at   | inhibitor of DNA binding 4                            | BB121406  | 15904        | 1.79 |
| 1423653_at   | ATPase, Na+/K+ transporting, alpha 1 polypeptide      | BC025618  | 11928        | 1.79 |
| 1424040_at   | cDNA sequence BC019977                                | BC019977  | 245877       | 1.79 |
| 1424183_at   | acetyl-Coenzyme A acetyltransferase 1                 | BG070487  | 110446       | 1.79 |
| 1425610_s_at | UDP-N-acetyl-alpha-D-galactosamine:polypeptide l      | AF348968  | 108148       | 1.79 |
| 1427762_x_at | histone 1, H2bp                                       | M25487    | 319188       | 1.79 |
| 1431602_a_at | RIKEN cDNA 1810064L21 gene                            | AK007746  | 66435        | 1.79 |
| 1433963_a_at | cDNA sequence BC032204                                | BG066664  | 108101       | 1.79 |
| 1434036_at   | Metastasis suppressor 1                               | AV024771  | 211401       | 1.79 |
| 1451672_at   | G protein-coupled receptor kinase 6                   | AF040748  | 26385        | 1.79 |
| 1452363_a_at | ATPase, Ca++ transporting, cardiac muscle, slow t     | AA245637  | 11938        | 1.79 |
| 1416369_at   | RIKEN cDNA 5730414C17 gene                            | NM_133680 | 66631        | 1.78 |
| 1417946_at   | abhydrolase domain containing 3                       | NM_134130 | 106861       | 1.78 |
| 1419153_at   | RIKEN cDNA 2810417H13 gene                            | AK017673  | 68026        | 1.78 |
| 1420401_a_at | receptor (calcitonin) activity modifying protein 3    | NM_019511 | 56089        | 1.78 |
| 1421487_a_at | non-catalytic region of tyrosine kinase adaptor prot  | NM_010878 | 17973        | 1.78 |
| 1421546_a_at | Rac GTPase-activating protein 1                       | NM_012025 | 26934        | 1.78 |
| 1423493_a_at | nuclear factor I/X                                    | BB315728  | 18032        | 1.78 |
| 1424669_at   | zinc finger, FYVE domain containing 21                | BC019521  | 68520        | 1.78 |
| 1444028_s_at | dedicator of cytokinesis 9                            | AA410148  | 105445       | 1.78 |
| 1449175_at   | G-protein coupled receptor 65                         | NM_008152 | 14744        | 1.78 |
| 1450920_at   | cyclin B2                                             | AK013312  | 12442        | 1.78 |
| 1452490_a_at | adaptor protein complex AP-2, alpha 2 subunit         | BC010597  | 11772        | 1.78 |
| 1453367_a_at | RIKEN cDNA 6330583M11 gene                            | BB178770  | 76192        | 1.78 |
| 1454120_a_at | ring finger protein 134                               | AK016709  | 71041        | 1.78 |
| 1417423_at   | glutamate receptor, ionotropic, N-methyl D-asparat    | NM_023168 | 66168        | 1.77 |

|              |                                                       |           |        |      |
|--------------|-------------------------------------------------------|-----------|--------|------|
| 1420688_a_at | sarcoglycan, epsilon                                  | NM_011360 | 20392  | 1.77 |
| 1421424_a_at | alanyl (membrane) aminopeptidase                      | NM_008486 | 16790  | 1.77 |
| 1422504_at   | glycine receptor, beta subunit                        | NM_010298 | 14658  | 1.77 |
| 1423548_s_at | serologically defined breast cancer antigen 84        | BB556862  | 66366  | 1.77 |
| 1423756_s_at | insulin-like growth factor binding protein 4          | BC019836  | 16010  | 1.77 |
| 1423984_a_at | myeloid ecotropic viral integration site-related gene | BC003762  | 17537  | 1.77 |
| 1426528_at   | neuropilin 2                                          | BQ176723  | 18187  | 1.77 |
| 1435306_a_at | kinesin family member 11                              | BM234447  | 16551  | 1.77 |
| 1448196_at   | methionine adenosyltransferase II, beta               | NM_134017 | 108645 | 1.77 |
| 1448421_s_at | asporin                                               | NM_025711 | 66695  | 1.77 |
| 1448847_at   | gb:BF139489 /DB_XREF=gi:10978529 /DB_XREF:            | NM_012032 |        | 1.77 |
| 1452268_at   | RIKEN cDNA 2810485I05 gene                            | AV337692  | 72826  | 1.77 |
| 1452780_at   | gb:AK008582.1 /DB_XREF=gi:12842855 /FEA=mF            | AV297256  |        | 1.77 |
| 1455482_at   | adaptor protein complex AP-2, alpha 2 subunit         | BQ175609  | 11772  | 1.77 |
| 1416741_at   | procollagen, type V, alpha 1                          | AW744319  | 12831  | 1.76 |
| 1416985_at   | gb:D87968.1 /DB_XREF=gi:1864014 /FEA=FLmR             | AB018194  |        | 1.76 |
| 1423547_at   | lysozyme                                              | AW208566  | 17105  | 1.76 |
| 1426368_at   | gb:AK014548.1 /DB_XREF=gi:12852473 /FEA=FL            | AK014548  |        | 1.76 |
| 1449093_at   | cardiotrophin 1                                       | NM_007795 | 13019  | 1.76 |
| 1452014_a_at | insulin-like growth factor 1                          | AF440694  | 16000  | 1.76 |
| 1452534_a_at | high mobility group box 2                             | X67668    | 97165  | 1.76 |
| 1460692_at   | HLA-B associated transcript 8                         | BI412952  | 110147 | 1.76 |
| 1417819_at   | torsin family 1, member B                             | BB004887  | 30934  | 1.75 |
| 1418061_at   | latent transforming growth factor beta binding prote  | NM_013589 | 16997  | 1.75 |
| 1419435_at   | aldehyde oxidase 1                                    | NM_009676 | 11761  | 1.75 |
| 1423298_at   | adducin 3 (gamma)                                     | BM239842  | 27360  | 1.75 |
| 1424225_at   | ankyrin repeat and SOCS box-containing protein 8      | AF398969  | 78541  | 1.75 |
| 1424849_at   | RIKEN cDNA 2310038K02 gene                            | BC026444  | 233064 | 1.75 |
| 1425190_a_at | RIKEN cDNA 1700048E23 gene                            | BC025612  | 73373  | 1.75 |
| 1425548_a_at | leukocyte specific transcript 1                       | U72644    | 16988  | 1.75 |
| 1426576_at   | transmembrane protein 23                              | BE629162  | 208449 | 1.75 |
| 1426801_at   | septin 8                                              | BB756379  | 20362  | 1.75 |
| 1426906_at   | interferon activated gene 203                         | M74124    | 15950  | 1.75 |
| 1426948_at   | translocated promoter region                          | BM214109  | 108989 | 1.75 |
| 1427441_a_at | succinate-Coenzyme A ligase, GDP-forming, beta s      | BF608645  | 20917  | 1.75 |
| 1427705_a_at | nuclear factor of kappa light chain gene enhancer ii  | L28118    | 18033  | 1.75 |
| 1428904_at   | RIKEN cDNA E230022H04 gene                            | AK017359  | 225339 | 1.75 |
| 1433678_at   | expressed sequence AI132321                           | BB210623  | 104759 | 1.75 |
| 1435737_a_at | nuclear distribution gene E homolog 1 (A nidulans)    | BQ032232  | 67203  | 1.75 |
| 1436528_at   | Kazal-type serine protease inhibitor domain 1         | AI842353  | 107250 | 1.75 |
| 1448491_at   | enoyl coenzyme A hydratase 1, peroxisomal             | NM_016772 | 51798  | 1.75 |
| 1448710_at   | chemokine (C-X-C motif) receptor 4                    | D87747    | 12767  | 1.75 |
| 1449025_at   | interferon-induced protein with tetratricopeptide rep | NM_010501 | 15959  | 1.75 |
| 1453913_a_at | transporter 2, ATP-binding cassette, sub-family B (N  | BE691515  | 21355  | 1.75 |
| 1460205_at   | RIKEN cDNA 6720485C15 gene                            | NM_026551 | 68087  | 1.75 |
| 1416032_at   | RIKEN cDNA 1110006I15 gene                            | AW494906  | 68539  | 1.74 |
| 1417424_at   | immediate early response 3 interacting protein 1      | BE287896  | 66191  | 1.74 |
| 1418460_at   | SH3 domain protein D19                                | NM_012059 | 27059  | 1.74 |
| 1419637_s_at | RIKEN cDNA 4833420G17 gene                            | BG067119  | 67392  | 1.74 |
| 1425025_at   | cDNA sequence BC022145                                | BC022145  | 217203 | 1.74 |
| 1425466_at   | SUMO/sentrin specific protease 2                      | AV317107  | 75826  | 1.74 |
| 1426580_at   | polo-like kinase 4 (Drosophila)                       | BB706079  | 20873  | 1.74 |
| 1427139_at   | a disintegrin-like and metalloprotease (reprolysin ty | BG064835  | 224697 | 1.74 |

|              |                                                        |           |              |      |
|--------------|--------------------------------------------------------|-----------|--------------|------|
| 1432042_a_at | smu-1 suppressor of mec-8 and unc-52 homolog (C        | AK011140  | 74255        | 1.74 |
| 1433645_at   | RIKEN cDNA 2210409B22 gene                             | BM207133  | 70174        | 1.74 |
| 1437052_s_at | solute carrier family 2 (facilitated glucose transport | BB414515  | 20527        | 1.74 |
| 1450059_at   | gb:BG072083 /DB_XREF=gi:12554652 /DB_XREF              | BG072083  |              | 1.74 |
| 1452250_a_at | procollagen, type VI, alpha 2                          | BI455189  | 12834        | 1.74 |
| 1452770_at   | vitamin K epoxide reductase complex, subunit 1         | AK003237  | 27973        | 1.74 |
| 1416629_at   | solute carrier family 1 (neutral amino acid transport  | NM_009201 | 20514        | 1.73 |
| 1417183_at   | DnaJ (Hsp40) homolog, subfamily A, member 2            | C77509    | 56445        | 1.73 |
| 1418392_a_at | guanylate nucleotide binding protein 4                 | NM_018734 | 55932        | 1.73 |
| 1418440_at   | procollagen, type VIII, alpha 1                        | NM_007739 | 12837        | 1.73 |
| 1419324_at   | LIM homeobox protein 9                                 | NM_010714 | 16876        | 1.73 |
| 1422795_at   | cullin 3                                               | AV273804  | 26554        | 1.73 |
| 1423852_at   | RIKEN cDNA 9430059P22 gene                             | BC024118  | 219134       | 1.73 |
| 1424131_at   | procollagen, type VI, alpha 3                          | AF064749  | 12835        | 1.73 |
| 1426025_s_at | lysosomal-associated protein transmembrane 5           | U29539    | 16792        | 1.73 |
| 1427471_at   | F-box and leucine-rich repeat protein 3                | BF782863  | 50789        | 1.73 |
| 1427739_a_at | transformation related protein 53                      | AJ297973  | 22059        | 1.73 |
| 1429775_a_at | transmembrane 7 superfamily member 1                   | AK009736  | 83924        | 1.73 |
| 1434379_at   | RIKEN cDNA 2810410A03 gene                             | BG868949  | 17122        | 1.73 |
| 1448876_at   | Ellis van Creveld gene homolog (human)                 | NM_021292 | 59056        | 1.73 |
| 1451080_at   | ubiquitin specific protease 1                          | BC018179  | 230484       | 1.73 |
| 1452721_a_at | RIKEN cDNA 2900091E11 gene                             | BM210204  | 67282        | 1.73 |
| 1416782_s_at | PRA1 domain family 2                                   | NM_138602 | 54637        | 1.72 |
| 1417326_a_at | anaphase promoting complex subunit 11 homolog (        | NM_025389 | 66156        | 1.72 |
| 1419598_at   | membrane-spanning 4-domains, subfamily A, mem          | NM_026835 | 68774        | 1.72 |
| 1419667_at   | sarcoglycan, beta (dystrophin-associated glycoprot     | AK014381  | 24051        | 1.72 |
| 1420821_at   | sphingosine-1-phosphate phosphatase 1                  | NM_030750 | 81535        | 1.72 |
| 1421891_at   | ST3 beta-galactoside alpha-2,3-sialyltransferase 2     | BB750118  | 20444        | 1.72 |
| 1423314_s_at | phosphodiesterase 7A                                   | BG070255  | 18583        | 1.72 |
| 1423478_at   | protein kinase C, beta 1                               | BF660388  | 18751        | 1.72 |
| 1423743_at   | archain 1                                              | BC017124  | 213827       | 1.72 |
| 1425913_a_at | RIKEN cDNA 2810022L02 gene                             | BC014764  | 67198        | 1.72 |
| 1426963_at   | phosphofurin acidic cluster sorting protein 1-like     | BI412345  | 217893       | 1.72 |
| 1427318_s_at | dysferlin /// fer-1-like 3, myoferlin (C. elegans)     | BI555209  | 226101 /// 2 | 1.72 |
| 1429947_a_at | Z-DNA binding protein 1                                | AK008179  | 58203        | 1.72 |
| 1431030_a_at | ring finger protein 14                                 | AK010162  | 56736        | 1.72 |
| 1448775_at   | interferon activated gene 203                          | NM_008328 | 15950        | 1.72 |
| 1449154_at   | procollagen, type XI, alpha 1                          | NM_007729 | 12814        | 1.72 |
| 1449531_at   | leprecan-like 2                                        | BC003726  | 14789        | 1.72 |
| 1450877_at   | cDNA sequence BC005537                                 | BI155782  | 79555        | 1.72 |
| 1453299_a_at | purine-nucleoside phosphorylase                        | AK008143  | 18950        | 1.72 |
| 1417244_a_at | interferon regulatory factor 7                         | NM_016850 | 54123        | 1.71 |
| 1418240_at   | guanylate nucleotide binding protein 2                 | NM_010260 | 14469        | 1.71 |
| 1419225_at   | calcium channel, voltage dependent, alpha2/delta s     | NM_009785 | 12294        | 1.71 |
| 1421116_a_at | reticulin 4                                            | NM_024226 | 68585        | 1.71 |
| 1423499_at   | synuclein, alpha interacting protein (synphilin)       | AK017012  | 67847        | 1.71 |
| 1423790_at   | death-associated protein                               | BC024876  | 223453       | 1.71 |
| 1426766_at   | RIKEN cDNA 6330403K07 gene                             | AK018106  | 103712       | 1.71 |
| 1427076_at   | macrophage expressed gene 1                            | L20315    | 17476        | 1.71 |
| 1427884_at   | procollagen, type III, alpha 1                         | AW550625  | 12825        | 1.71 |
| 1428187_at   | CD47 antigen (Rh-related antigen, integrin-associa     | AK018679  | 16423        | 1.71 |
| 1428699_at   | spermine synthase                                      | AW744143  | 20603        | 1.71 |
| 1438716_at   | tripartite motif protein 30-like                       | BG068242  | 209387       | 1.71 |

|              |                                                        |           |              |      |
|--------------|--------------------------------------------------------|-----------|--------------|------|
| 1448148_at   | granulin                                               | M86736    | 14824        | 1.71 |
| 1448192_s_at | phosphoribosyl pyrophosphate synthetase 1              | AK011304  | 19139        | 1.71 |
| 1449049_at   | toll-like receptor 1                                   | AF316985  | 21897        | 1.71 |
| 1450405_at   | mitochondrial ribosomal protein L19                    | BB041267  | 56284        | 1.71 |
| 1451091_at   | thioredoxin domain containing 5                        | BC016252  | 105245       | 1.71 |
| 1451332_at   | zinc finger protein 521                                | BC021376  | 225207       | 1.71 |
| 1452540_a_at | histone 1, H2bc /// histone 1, H2be /// histone 1, H2M | M25487    | 319179 /// 3 | 1.71 |
| 1416203_at   | aquaporin 1                                            | NM_007472 | 11826        | 1.7  |
| 1417018_at   | epidermal growth factor-containing fibulin-like extra  | NM_021474 | 58859        | 1.7  |
| 1423418_at   | farnesyl diphosphate synthetase                        | BI247584  | 110196       | 1.7  |
| 1423689_a_at | G-protein signalling modulator 1 (AGS3-like, C. ele    | BC026486  | 67839        | 1.7  |
| 1425120_x_at | RIKEN cDNA 1810023F06 gene                             | BC021795  | 217845       | 1.7  |
| 1427548_a_at | chloride channel, nucleotide-sensitive, 1A             | U53455    | 12729        | 1.7  |
| 1428115_a_at | RAB2B, member RAS oncogene family                      | AK005230  | 76338        | 1.7  |
| 1432332_a_at | DNA segment, Chr 7, Roswell Park 2 complex, exp        | AK008430  | 110959       | 1.7  |
| 1435504_at   | Restin-like 2                                          | BM217861  | 78785        | 1.7  |
| 1438480_a_at | thymocyte protein thy28                                | AV301675  | 77862        | 1.7  |
| 1448119_at   | 2,3-bisphosphoglycerate mutase                         | NM_007563 | 12183        | 1.7  |
| 1449264_at   | synaptotagmin 11                                       | BC025207  | 229521       | 1.7  |
| 1451047_at   | integral membrane protein 2A                           | BI966443  | 16431        | 1.7  |
| 1452105_a_at | tuberous sclerosis 2                                   | BB759096  | 22084        | 1.7  |
| 1452384_at   | ectonucleotide pyrophosphatase/phosphodiesteras        | AV224446  | 209558       | 1.7  |
| 1452954_at   | ubiquitin-conjugating enzyme E2C                       | AV162459  | 68612        | 1.7  |
| 1453740_a_at | cyclin L2                                              | BI112766  | 56036        | 1.7  |
| 1417148_at   | platelet derived growth factor receptor, beta polype   | NM_008809 | 18596        | 1.69 |
| 1419873_s_at | colony stimulating factor 1 receptor                   | AI323359  | 12978        | 1.69 |
| 1422619_at   | gb:NM_008903.1 /DB_XREF=gi:6679430 /GEN=Pf             | NM_008903 |              | 1.69 |
| 1423757_x_at | insulin-like growth factor binding protein 4           | BC019836  | 16010        | 1.69 |
| 1423774_a_at | protein regulator of cytokinesis 1                     | BC005475  | 233406       | 1.69 |
| 1424498_at   | RIKEN cDNA 5730596K20 gene                             | BC017138  | 109168       | 1.69 |
| 1425496_at   | ATP-binding cassette, sub-family A (ABC1), membe       | AK007703  | 27410        | 1.69 |
| 1425951_a_at | C-type lectin domain family 4, member n                | AF240358  | 56620        | 1.69 |
| 1426208_x_at | pleiomorphic adenoma gene-like 1                       | AF147785  | 22634        | 1.69 |
| 1426652_at   | minichromosome maintenance deficient 3 (S. cerev       | BI658327  | 17215        | 1.69 |
| 1434695_at   | RIKEN cDNA 2810047L02 gene                             | AV270035  | 76843        | 1.69 |
| 1435375_at   | cDNA sequence BC052328                                 | BM224662  | 223433       | 1.69 |
| 1448336_at   | developmentally regulated GTP binding protein 1        | NM_007879 | 13494        | 1.69 |
| 1449195_s_at | chemokine (C-X-C motif) ligand 16                      | BC019961  | 66102        | 1.69 |
| 1452328_s_at | gb:BF160731 /DB_XREF=gi:11040838 /DB_XREF=             | BF160731  |              | 1.69 |
| 1456741_s_at | glycoprotein m6a                                       | BB348674  | 234267       | 1.69 |
| 1415907_at   | cyclin D3                                              | NM_007632 | 12445        | 1.68 |
| 1416016_at   | gb:BC024897.1 /DB_XREF=gi:19352971 /FEA=FL             | AW048052  |              | 1.68 |
| 1418439_at   | DNA segment, Chr 10, ERATO Doi 322, expressed          | NM_026065 | 67270        | 1.68 |
| 1419182_at   | polydomain protein                                     | NM_022814 | 64817        | 1.68 |
| 1422243_at   | fibroblast growth factor 7                             | NM_008008 | 14178        | 1.68 |
| 1422453_at   | pre-mRNA processing factor 8                           | NM_138659 | 192159       | 1.68 |
| 1422563_at   | complement receptor related protein                    | NM_013499 | 12946        | 1.68 |
| 1424046_at   | budding uninhibited by benzimidazoles 1 homolog (      | AF002823  | 12235        | 1.68 |
| 1424732_s_at | RIKEN cDNA 3110005G23 gene                             | BC020157  | 73067        | 1.68 |
| 1425281_a_at | delta sleep inducing peptide, immunoreactor            | AF201289  | 14605        | 1.68 |
| 1425434_a_at | macrophage scavenger receptor 1                        | L04274    | 20288        | 1.68 |
| 1425492_at   | bone morphogenetic protein receptor, type 1A           | BM939768  | 12166        | 1.68 |
| 1425654_a_at | DNA segment, Chr 15, ERATO Doi 366, expressed          | AF307845  | 65970        | 1.68 |

|              |                                                       |           |        |      |
|--------------|-------------------------------------------------------|-----------|--------|------|
| 1426981_at   | paired basic amino acid cleaving system 4             | BI157485  | 18553  | 1.68 |
| 1427680_a_at | nuclear factor I/B                                    | Y07687    | 18028  | 1.68 |
| 1438009_at   | histone 1, H2ad                                       | W91024    | 319165 | 1.68 |
| 1448648_at   | RIKEN cDNA 9130005N14 gene                            | NM_026667 | 68303  | 1.68 |
| 1450106_a_at | Ena-vasodilator stimulated phosphoprotein             | NM_007965 | 14026  | 1.68 |
| 1450454_at   | torsin family 3, member A                             | NM_023141 | 30935  | 1.68 |
| 1452154_at   | gb:BE915338 /DB_XREF=gi:10414866 /DB_XREF: BE915338   |           |        | 1.68 |
| 1460672_at   | RIKEN cDNA 2410002F23 gene                            | BC016099  | 66976  | 1.68 |
| 1416818_at   | parvin, alpha                                         | NM_020606 | 57342  | 1.67 |
| 1416904_at   | muscleblind-like 1 (Drosophila)                       | NM_020007 | 56758  | 1.67 |
| 1419313_at   | cyclin T1                                             | NM_009833 | 12455  | 1.67 |
| 1419668_at   | sarcoglycan, beta (dystrophin-associated glycoprot    | AK014381  | 24051  | 1.67 |
| 1422601_at   | serine (or cysteine) proteinase inhibitor, clade B, m | NM_009256 | 20723  | 1.67 |
| 1422736_at   | RAN binding protein 9                                 | NM_019930 | 56705  | 1.67 |
| 1423800_at   | aspartyl-tRNA synthetase                              | BC008638  | 226414 | 1.67 |
| 1428301_at   | RIKEN cDNA 2610042L04 gene                            | BM195235  | 67055  | 1.67 |
| 1428787_at   | hematopoietic protein 1                               | BM238906  | 105855 | 1.67 |
| 1434380_at   | Diabetic nephropathy-like protein (Dnr12) mRNA, p     | BM241271  |        | 1.67 |
| 1448524_s_at | signal sequence receptor, delta                       | NM_009279 | 20832  | 1.67 |
| 1450431_a_at | gb:D85414.1 /DB_XREF=gi:1374781 /GEN=Nedd4            | NM_010890 |        | 1.67 |
| 1450724_at   | down-regulated by Ctnnb1, a                           | NM_053090 | 84652  | 1.67 |
| 1451161_a_at | EGF-like module containing, mucin-like, hormone r     | U66888    | 13733  | 1.67 |
| 1452173_at   | hydroxyacyl-Coenzyme A dehydrogenase/3-ketoac         | AW107842  | 97212  | 1.67 |
| 1416527_at   | RAB32, member RAS oncogene family                     | NM_026405 | 67844  | 1.66 |
| 1416906_at   | anaphase-promoting complex subunit 5                  | NM_021505 | 59008  | 1.66 |
| 1417261_at   | mbt domain containing 1                               | NM_134012 | 103537 | 1.66 |
| 1419821_s_at | gb:A1788952 /DB_XREF=gi:5336668 /DB_XREF=u            | A1788952  |        | 1.66 |
| 1420624_a_at | vesicle-associated membrane protein 8                 | NM_016794 | 22320  | 1.66 |
| 1421034_a_at | interleukin 4 receptor, alpha                         | NM_010557 | 16190  | 1.66 |
| 1422521_at   | dynactin 1                                            | NM_007835 | 13191  | 1.66 |
| 1422972_s_at | GCN5 general control of amino acid synthesis-like :   | NM_020004 | 14534  | 1.66 |
| 1425391_a_at | oxysterol binding protein-like 5                      | AB074008  | 79196  | 1.66 |
| 1425658_at   | CD109 antigen                                         | AY083458  | 235505 | 1.66 |
| 1426160_a_at | serine/threonine kinase 16                            | AF062076  | 20872  | 1.66 |
| 1427771_x_at | integrin beta 1 (fibronectin receptor beta)           | U37029    | 16412  | 1.66 |
| 1428179_at   | NADH dehydrogenase (ubiquinone) flavoprotein 2        | BI692577  | 72900  | 1.66 |
| 1435477_s_at | Fc receptor, IgG, low affinity IIb                    | BM224327  | 14130  | 1.66 |
| 1450065_at   | adenylate cyclase 7                                   | NM_007406 | 11513  | 1.66 |
| 1415972_at   | myristoylated alanine rich protein kinase C substrat  | AW546141  | 17118  | 1.65 |
| 1416105_at   | nicotinamide nucleotide transhydrogenase              | BC008518  | 18115  | 1.65 |
| 1416301_a_at | early B-cell factor 1                                 | BB125261  | 13591  | 1.65 |
| 1418629_a_at | gb:BE447456 /DB_XREF=gi:9447033 /DB_XREF=             | NM_011317 |        | 1.65 |
| 1421819_a_at | SET translocation                                     | BF134272  | 56086  | 1.65 |
| 1421861_at   | calsyntenin 1                                         | BG065300  | 65945  | 1.65 |
| 1421916_at   | platelet derived growth factor receptor, alpha polyp  | AW537708  | 18595  | 1.65 |
| 1423382_a_at | heterogeneous nuclear ribonucleoprotein F             | AW412441  | 98758  | 1.65 |
| 1425048_a_at | high mobility group box 1                             | U00431    | 15289  | 1.65 |
| 1426640_s_at | tribbles homolog 2 (Drosophila)                       | BB354684  | 217410 | 1.65 |
| 1428870_at   | gb:BB093407 /DB_XREF=gi:15407802 /DB_XREF: BM213850   |           |        | 1.65 |
| 1432029_a_at | stromal membrane-associated protein 1                 | AK006817  | 98366  | 1.65 |
| 1448525_a_at | BCL2/adenovirus E1B 19kDa-interacting protein 3-l     | AK018668  | 12177  | 1.65 |
| 1448619_at   | 7-dehydrocholesterol reductase                        | NM_007856 | 13360  | 1.65 |
| 1449209_a_at | retinol dehydrogenase 11                              | AB030503  | 17252  | 1.65 |

|              |                                                        |           |              |      |
|--------------|--------------------------------------------------------|-----------|--------------|------|
| 1449334_at   | tissue inhibitor of metalloproteinase 3                | BI111620  | 21859        | 1.65 |
| 1450380_at   | ependymin related protein 2 (zebrafish)                | AF353717  | 105298       | 1.65 |
| 1450663_at   | thrombospondin 2                                       | NM_011581 | 21826        | 1.65 |
| 1450997_at   | serine/threonine kinase 17b (apoptosis-inducing)       | AV173139  | 98267        | 1.65 |
| 1452279_at   | properdin factor, complement                           | BB800282  | 18636        | 1.65 |
| 1454023_a_at | DNA segment, Chr 1, Brigham & Women's Genetic          | AK006466  | 74241        | 1.65 |
| 1454161_s_at | RIKEN cDNA 0610007P14 gene                             | AK002308  | 58520        | 1.65 |
| 1415836_at   | pyrroline-5-carboxylate synthetase (glutamate gam      | NM_019698 | 56454        | 1.64 |
| 1416309_at   | nucleolar and spindle associated protein 1             | BC009096  | 108907       | 1.64 |
| 1417947_at   | proliferating cell nuclear antigen                     | BC010343  | 18538        | 1.64 |
| 1418340_at   | Fc receptor, IgE, high affinity I, gamma polypeptide   | NM_010185 | 14127        | 1.64 |
| 1420634_a_at | MAD homolog 2 (Drosophila)                             | NM_010754 | 17126        | 1.64 |
| 1423111_at   | ATP synthase, H+ transporting, mitochondrial F1 cc     | BM213627  | 11946        | 1.64 |
| 1423463_a_at | DNA segment, Chr 2, ERATO Doi 750, expressed           | AK012148  | 51944        | 1.64 |
| 1424321_at   | replication factor C (activator 1) 4                   | BC003335  | 106344       | 1.64 |
| 1424921_at   | bone marrow stromal cell antigen 2                     | BC008532  | 69550        | 1.64 |
| 1425483_at   | thymocyte selection-associated HMG box gene            | BB547854  | 252838       | 1.64 |
| 1425491_at   | bone morphogenetic protein receptor, type 1A           | BM939768  | 12166        | 1.64 |
| 1426088_at   | gb:BC004015.1 /DB_XREF=gi:13278405 /FEA=FL             | BC004015  |              | 1.64 |
| 1426349_s_at | thymopoietin                                           | AA153892  | 21917        | 1.64 |
| 1426831_at   | S-adenosylhomocysteine hydrolase-like 1                | BB831090  | 229709       | 1.64 |
| 1433504_at   | brain glycogen phosphorylase                           | AW547988  | 110078       | 1.64 |
| 1434900_at   | MKL (megakaryoblastic leukemia)/myocardin-like 1       | BM196656  | 223701       | 1.64 |
| 1438211_s_at | D site albumin promoter binding protein                | BB550183  | 13170        | 1.64 |
| 1448883_at   | legumain                                               | NM_011175 | 19141        | 1.64 |
| 1451134_a_at | RIKEN cDNA 2410018G23 gene                             | BC026789  | 69742        | 1.64 |
| 1453251_at   | DEAH (Asp-Glu-Ala-His) box polypeptide 30              | AK013413  | 72831        | 1.64 |
| 1460194_at   | phytanoyl-CoA hydroxylase                              | NM_010726 | 16922        | 1.64 |
| 1460460_a_at | golgi reassembly stacking protein 2                    | AK010664  | 70231        | 1.64 |
| 1415773_at   | nucleolin                                              | BF118393  | 17975        | 1.63 |
| 1415977_at   | myo-inositol 1-phosphate synthase A1                   | NM_023627 | 71780        | 1.63 |
| 1415983_at   | lymphocyte cytosolic protein 1                         | NM_008879 | 18826        | 1.63 |
| 1416691_at   | GTP binding protein 2                                  | NM_019581 | 56055        | 1.63 |
| 1416732_at   | topoisomerase (DNA) II beta                            | BB166592  | 21974        | 1.63 |
| 1417399_at   | growth arrest specific 6                               | NM_019521 | 14456        | 1.63 |
| 1417534_at   | gb:NM_010580.1 /DB_XREF=gi:6754379 /GEN=Itc            | NM_010580 |              | 1.63 |
| 1417870_x_at | cathepsin Z                                            | NM_022325 | 64138        | 1.63 |
| 1417963_at   | phospholipid transfer protein                          | NM_011125 | 18830        | 1.63 |
| 1421009_at   | radical S-adenosyl methionine domain containing 2      | BB741897  | 58185        | 1.63 |
| 1421033_a_at | transcription elongation regulator 1 (CA150)           | AW046403  | 56070        | 1.63 |
| 1424906_at   | RIKEN cDNA E030024M05 gene                             | BC025220  | 217430       | 1.63 |
| 1426532_at   | zinc finger, MYND domain containing 11                 | BB832996  | 66505        | 1.63 |
| 1427161_at   | centromere autoantigen F                               | BE848253  | 108000       | 1.63 |
| 1427212_at   | mitogen-activated protein kinase associated proteir    | BC027377  | 227743       | 1.63 |
| 1430780_a_at | phosphomannomutase 1                                   | BI739353  | 29858        | 1.63 |
| 1438808_at   | gb:BB450072 /DB_XREF=gi:16425416 /DB_XREF:             | BB450072  |              | 1.63 |
| 1450681_at   | zinc finger protein 143                                | NM_009281 | 20841        | 1.63 |
| 1452046_a_at | protein phosphatase 1, catalytic subunit, gamma is     | BG071790  | 19047        | 1.63 |
| 1452079_s_at | testis derived transcript 3, pseudogene /// testis der | BE851193  | 114893 /// 5 | 1.63 |
| 1452314_at   | kinesin family member 11                               | BB827235  | 16551        | 1.63 |
| 1453473_a_at | t-complex testis expressed 1                           | BG094946  | 21648        | 1.63 |
| 1454631_at   | RIKEN cDNA 6330549H03 gene                             | BI689897  | 108667       | 1.63 |
| 1455898_x_at | solute carrier family 2 (facilitated glucose transport | BB414515  | 20527        | 1.63 |

|              |                                                               |           |        |      |
|--------------|---------------------------------------------------------------|-----------|--------|------|
| 1459909_at   | Nuclear factor I/X                                            | BI249259  | 18032  | 1.63 |
| 1460555_at   | RIKEN cDNA 6330500D04 gene                                    | BM242294  | 193385 | 1.63 |
| 1415980_at   | ATP synthase, H <sup>+</sup> transporting, mitochondrial F0 c | NM_026468 | 67942  | 1.62 |
| 1416006_at   | midkine                                                       | M34328    | 17242  | 1.62 |
| 1416474_at   | neighbor of Punc E11                                          | NM_020043 | 56741  | 1.62 |
| 1417960_at   | cytoplasmic polyadenylation element binding protei            | NM_007755 | 12877  | 1.62 |
| 1418049_at   | latent transforming growth factor beta binding prote          | NM_008520 | 16998  | 1.62 |
| 1418456_a_at | chemokine (C-X-C motif) ligand 14                             | AF252873  | 57266  | 1.62 |
| 1418529_at   | O-sialoglycoprotein endopeptidase                             | NM_133676 | 66246  | 1.62 |
| 1423870_at   | RIKEN cDNA 2610208M17 gene                                    | BI104583  | 108909 | 1.62 |
| 1424186_at   | RIKEN cDNA 2610001E17 gene                                    | BG074158  | 67896  | 1.62 |
| 1424410_at   | tetratricopeptide repeat domain 8                             | BC017523  | 76260  | 1.62 |
| 1424427_at   | DNA segment, Chr 1, ERATO Doi 251, expressed                  | BC027337  | 27878  | 1.62 |
| 1424708_at   | RIKEN cDNA 1110014C03 gene                                    | BI409239  | 68581  | 1.62 |
| 1425933_a_at | 5'-nucleotidase, cytosolic II                                 | BC006028  | 76952  | 1.62 |
| 1434801_x_at | solute carrier family 25 (mitochondrial carrier, aden         | AV026569  | 11740  | 1.62 |
| 1435986_x_at | succinate dehydrogenase complex, subunit C, inte              | AW107712  | 66052  | 1.62 |
| 1436058_at   | radical S-adenosyl methionine domain containing 2             | BB132493  | 58185  | 1.62 |
| 1448632_at   | proteasome (prosome, macropain) subunit, beta ty              | NM_013640 | 19171  | 1.62 |
| 1448910_at   | peroxisomal trans-2-enoyl-CoA reductase                       | NM_023523 | 111175 | 1.62 |
| 1450420_at   | stromal antigen 1                                             | BQ174473  | 20842  | 1.62 |
| 1451025_at   | ADP-ribosylation factor-like 1                                | AW011908  | 104303 | 1.62 |
| 1451121_a_at | glioma tumor suppressor candidate region gene 2               | BC017637  | 68077  | 1.62 |
| 1451680_at   | neoplastic progression 3                                      | BC011325  | 76650  | 1.62 |
| 1451981_at   | gene trap ROSA b-geo 22                                       | AF303106  | 110012 | 1.62 |
| 1460718_s_at | mitochondrial carrier homolog 1 (C. elegans)                  | AF192558  | 56462  | 1.62 |
| 1416121_at   | lysyl oxidase                                                 | M65143    | 16948  | 1.61 |
| 1416132_at   | RIKEN cDNA C920006C10 gene                                    | BB188557  | 76740  | 1.61 |
| 1421083_x_at | barrier to autointegration factor 1                           | NM_011793 | 23825  | 1.61 |
| 1421462_a_at | leprecan 1                                                    | NM_019783 | 56401  | 1.61 |
| 1422510_at   | CTD (carboxy-terminal domain, RNA polymerase II               | NM_133710 | 69274  | 1.61 |
| 1423098_at   | calpain 7                                                     | BQ257745  | 12339  | 1.61 |
| 1423316_at   | transmembrane protein 39a                                     | AK017817  | 67846  | 1.61 |
| 1423495_at   | 2-4-dienoyl-Coenzyme A reductase 2, peroxisomal               | BE952632  | 26378  | 1.61 |
| 1426298_at   | Iroquois related homeobox 2 (Drosophila)                      | AF295369  | 16372  | 1.61 |
| 1427298_at   | neoplastic progression 1                                      | BB542096  | 18152  | 1.61 |
| 1427516_a_at | biregional cell adhesion molecule-related/down-reg            | AF388037  | 117606 | 1.61 |
| 1433803_at   | Janus kinase 1                                                | BQ032637  | 16451  | 1.61 |
| 1435862_at   | Son cell proliferation protein                                | BG067046  | 20658  | 1.61 |
| 1438223_at   | gb:BG065705 /DB_XREF=gi:12548268 /DB_XREF                     | BG065705  |        | 1.61 |
| 1449126_at   | zinc finger protein 90                                        | NM_011764 | 22751  | 1.61 |
| 1450268_at   | fidgetin                                                      | NM_021716 | 60344  | 1.61 |
| 1450478_a_at | protein tyrosine phosphatase, non-receptor type 12            | X63440    | 19248  | 1.61 |
| 1450738_at   | gb:NM_016705.1 /DB_XREF=gi:7710045 /GEN=Ki                    | NM_016705 |        | 1.61 |
| 1451358_a_at | Rac GTPase-activating protein 1                               | AF212320  | 26934  | 1.61 |
| 1451564_at   | poly (ADP-ribose) polymerase family, member 14                | BC021340  | 432411 | 1.61 |
| 1452829_at   | carbamoyl-phosphate synthetase 2, aspartate trans             | AK010453  | 69719  | 1.61 |
| 1456651_a_at | translocated promoter region                                  | BG067858  | 108989 | 1.61 |
| 1460317_s_at | Guanine nucleotide binding protein, alpha 13                  | BI662324  | 14674  | 1.61 |
| 1415792_at   | expressed sequence AL033326                                   | NM_019705 | 24105  | 1.6  |
| 1416695_at   | benzodiazepine receptor, peripheral                           | BC002055  | 12257  | 1.6  |
| 1417056_at   | proteasome (prosome, macropain) 28 subunit, alph              | NM_011189 | 19186  | 1.6  |
| 1423262_a_at | H3 histone, family 3A                                         | BI111967  | 15078  | 1.6  |

|              |                                                           |           |        |      |
|--------------|-----------------------------------------------------------|-----------|--------|------|
| 1423423_at   | glucose regulated protein                                 | BF319868  | 14827  | 1.6  |
| 1423452_at   | serine/threonine kinase 17b (apoptosis-inducing)          | AV173139  | 98267  | 1.6  |
| 1423986_a_at | scotin gene                                               | BC010238  | 66940  | 1.6  |
| 1425348_a_at | signal recognition particle receptor, B subunit           | BC003798  | 20818  | 1.6  |
| 1426555_at   | serine carboxypeptidase 1                                 | AK014680  | 74617  | 1.6  |
| 1434920_a_at | Ena-vasodilator stimulated phosphoprotein                 | AW553781  | 14026  | 1.6  |
| 1435321_at   | RIKEN cDNA 3732412D22 gene                                | BM117827  | 77569  | 1.6  |
| 1451395_at   | DNA segment, Chr 5, Brigham & Women's Genetic             | BC021492  | 215707 | 1.6  |
| 1452428_a_at | beta-2 microglobulin                                      | AI099111  | 12010  | 1.6  |
| 1454694_a_at | topoisomerase (DNA) II alpha                              | BM211413  | 21973  | 1.6  |
| 1415908_at   | testis-specific protein, Y-encoded-like 1                 | AF042180  | 22110  | 1.59 |
| 1416076_at   | cyclin B1                                                 | NM_007629 | 268697 | 1.59 |
| 1416096_at   | expressed sequence AI413782                               | NM_134044 | 104799 | 1.59 |
| 1416102_at   | tyrosine 3-monooxygenase/tryptophan 5-monooxygenase       | AV027921  | 22631  | 1.59 |
| 1416176_at   | high mobility group box 1                                 | BF166000  | 15289  | 1.59 |
| 1416343_a_at | lysosomal membrane glycoprotein 2                         | NM_010685 | 16784  | 1.59 |
| 1416539_at   | yolk sac gene 2                                           | NM_011734 | 22619  | 1.59 |
| 1416726_s_at | ubiquitin-conjugating enzyme E2S                          | NM_133777 | 77891  | 1.59 |
| 1417730_at   | exostoses (multiple) 1                                    | NM_010162 | 14042  | 1.59 |
| 1418326_at   | solute carrier family 7 (cationic amino acid transporter) | BC026131  | 20539  | 1.59 |
| 1418892_at   | ras homolog gene family, member J                         | AF309564  | 80837  | 1.59 |
| 1418896_a_at | ribophorin II                                             | NM_019642 | 20014  | 1.59 |
| 1423600_a_at | Treacher Collins Franceschetti syndrome 1, homolog        | AW209012  | 21453  | 1.59 |
| 1424128_x_at | aurora kinase B                                           | BC003261  | 20877  | 1.59 |
| 1424648_at   | RAB, member of RAS oncogene family-like 4                 | BC017514  | 67042  | 1.59 |
| 1425529_s_at | DNA segment, Chr 19, Wayne State University 162           | BC026369  | 226178 | 1.59 |
| 1425702_a_at | ectonucleotide pyrophosphatase/phosphodiesterase          | BC011294  | 83965  | 1.59 |
| 1426434_at   | transmembrane protein 43                                  | AI747289  | 74122  | 1.59 |
| 1427050_at   | RIKEN cDNA 5730420B22 gene                                | BC027108  | 70561  | 1.59 |
| 1428531_at   | RIKEN cDNA 5930412E23 gene                                | BB457797  | 77065  | 1.59 |
| 1434054_at   | v-maf musculoaponeurotic fibrosarcoma oncogene            | BB342453  | 17134  | 1.59 |
| 1448372_a_at | transmembrane protein 4                                   | NM_019953 | 56530  | 1.59 |
| 1448777_at   | minichromosome maintenance deficient 2 mitotin (S)        | NM_008564 | 17216  | 1.59 |
| 1452393_at   | expressed sequence AI597013                               | BB014626  | 100182 | 1.59 |
| 1452427_s_at | expressed sequence AW742319                               | BM950003  | 57874  | 1.59 |
| 1455364_a_at | ribosomal protein S7                                      | AI414989  | 20115  | 1.59 |
| 1415759_a_at | hepatitis B virus x interacting protein                   | BC028547  | 68576  | 1.58 |
| 1415989_at   | vascular cell adhesion molecule 1                         | BB250384  | 22329  | 1.58 |
| 1418281_at   | RAD51 homolog (S. cerevisiae)                             | NM_011234 | 19361  | 1.58 |
| 1419451_at   | fizzy/cell division cycle 20 related 1 (Drosophila)       | BC006616  | 56371  | 1.58 |
| 1419703_at   | procollagen, type V, alpha 3                              | NM_016919 | 53867  | 1.58 |
| 1421014_a_at | citrate lyase beta like                                   | BC023398  | 69634  | 1.58 |
| 1423092_at   | inner centromere protein                                  | BI410774  | 16319  | 1.58 |
| 1423345_at   | degenerative spermatocyte homolog 1 (Drosophila)          | AV286991  | 13244  | 1.58 |
| 1426389_at   | calcium/calmodulin-dependent protein kinase ID            | BG071931  | 227541 | 1.58 |
| 1426410_at   | pyruvate dehydrogenase kinase, isoenzyme 3                | AV086243  | 236900 | 1.58 |
| 1426612_at   | timeless interacting protein                              | AK011357  | 66131  | 1.58 |
| 1426897_at   | RIKEN cDNA 2610510H01 gene                                | AV122997  | 108911 | 1.58 |
| 1427148_at   | gb:BF160731 /DB_XREF=gj:11040838 /DB_XREF=                | BF160731  |        | 1.58 |
| 1427296_at   | cDNA sequence BC010304                                    | BB553912  | 218236 | 1.58 |
| 1427447_a_at | TRIO and F-actin binding protein                          | BC003984  | 110253 | 1.58 |
| 1430527_a_at | ring finger protein 167                                   | AK017523  | 70510  | 1.58 |
| 1437406_x_at | insulin-like growth factor binding protein 4              | BB787243  | 16010  | 1.58 |



|              |                                                        |           |              |      |
|--------------|--------------------------------------------------------|-----------|--------------|------|
| 1448933_at   | protocadherin beta 17                                  | NM_053142 | 93888        | 1.58 |
| 1449053_s_at | component of oligomeric golgi complex 1                | BB210424  | 16834        | 1.58 |
| 1450241_a_at | ecotropic viral integration site 2a                    | NM_010161 | 14017        | 1.58 |
| 1450757_at   | cadherin 11                                            | NM_009866 | 12552        | 1.58 |
| 1450792_at   | TYRO protein tyrosine kinase binding protein           | NM_011662 | 22177        | 1.58 |
| 1450892_a_at | ubiquitin specific protease 4 (proto-oncogene)         | BF321773  | 22258        | 1.58 |
| 1450970_at   | glutamate oxaloacetate transaminase 1, soluble         | AA792094  | 14718        | 1.58 |
| 1452712_at   | heterogeneous nuclear ribonucleoprotein A3             | AK011930  | 229279       | 1.58 |
| 1453107_s_at | forkhead box M1 /// phosphatidylethanolamine bind      | AK008037  | 14235 /// 23 | 1.58 |
| 1454758_a_at | transforming growth factor beta 1 induced transcrip    | AU016382  | 21807        | 1.58 |
| 1416630_at   | inhibitor of DNA binding 3                             | NM_008321 | 15903        | 1.57 |
| 1416641_at   | ligase I, DNA, ATP-dependent                           | NM_010715 | 16881        | 1.57 |
| 1418622_at   | RAB2, member RAS oncogene family                       | NM_021518 | 59021        | 1.57 |
| 1419041_at   | DNA segment, Chr 8, Wayne State University 49, e       | BC003977  | 71927        | 1.57 |
| 1419444_at   | Sin3-associated polypeptide 18                         | NM_009119 | 20220        | 1.57 |
| 1420981_a_at | LIM domain only 4                                      | NM_010723 | 16911        | 1.57 |
| 1421846_at   | WD repeat and SOCS box-containing 2                    | BM730566  | 59043        | 1.57 |
| 1422993_s_at | THO complex 4                                          | NM_019484 | 21681        | 1.57 |
| 1423049_a_at | tropomyosin 1, alpha                                   | AK002271  | 22003        | 1.57 |
| 1423894_a_at | DALR anticodon binding domain containing 3             | BC013483  | 67789        | 1.57 |
| 1424727_at   | chemokine (C-C motif) receptor 5                       | D83648    | 12774        | 1.57 |
| 1424885_at   | RIKEN cDNA A630065K24 gene                             | BC011135  | 213417       | 1.57 |
| 1425665_a_at | signal recognition particle 54                         | BC005543  | 24067        | 1.57 |
| 1426254_at   | beta-amyloid binding protein precursor                 | AF353993  | 94043        | 1.57 |
| 1426397_at   | transforming growth factor, beta receptor II           | BG793483  | 21813        | 1.57 |
| 1426573_at   | gb:BM235734 /DB_XREF=gi:17871004 /DB_XREF              | BM235734  |              | 1.57 |
| 1427021_s_at | ferritin heavy chain 1 /// dipeptidase 2               | AK002778  | 14319 /// 31 | 1.57 |
| 1427112_at   | RIKEN cDNA 2700049H19 gene                             | AV127581  | 109008       | 1.57 |
| 1427511_at   | Beta-2 microglobulin                                   | AA170322  | 12010        | 1.57 |
| 1428050_a_at | RIKEN cDNA 0610007H07 gene                             | BC027637  | 68212        | 1.57 |
| 1428850_x_at | RIKEN cDNA 2410026K10 gene                             | AK004342  | 66478        | 1.57 |
| 1431339_a_at | EF hand domain containing 2                            | AK007560  | 27984        | 1.57 |
| 1431349_at   | heterogeneous nuclear ribonucleoprotein A/B            | AK013709  | 15384        | 1.57 |
| 1433496_at   | glycosyltransferase 25 domain containing 1             | AV122321  | 234407       | 1.57 |
| 1433892_at   | sperm associated antigen 5                             | BM208112  | 54141        | 1.57 |
| 1437405_a_at | insulin-like growth factor binding protein 4           | BB787243  | 16010        | 1.57 |
| 1448566_at   | solute carrier family 40 (iron-regulated transporter), | AF226613  | 53945        | 1.57 |
| 1449523_at   | B-cell CLL/lymphoma 7C                                 | NM_009746 | 12055        | 1.57 |
| 1450777_at   | 5'-3' exoribonuclease 2                                | NM_011917 | 24128        | 1.57 |
| 1451604_a_at | activin A receptor, type II-like 1                     | BC014291  | 11482        | 1.57 |
| 1451742_a_at | UDP-glucose pyrophosphorylase 2                        | AF424698  | 216558       | 1.57 |
| 1452731_x_at | RIKEN cDNA 2610042L04 gene                             | BM195235  | 67055        | 1.57 |
| 1453744_a_at | RIKEN cDNA 5530600A18 gene                             | AK017451  | 71452        | 1.57 |
| 1455176_a_at | gb:BF457392 /DB_XREF=gi:11523561 /DB_XREF=             | BF457392  |              | 1.57 |
| 1456360_at   | gb:BI466259 /DB_XREF=gi:15279137 /DB_XREF=             | BI466259  |              | 1.57 |
| 1417141_at   | interferon gamma induced GTPase                        | NM_018738 | 16145        | 1.56 |
| 1417823_at   | glycine C-acetyltransferase (2-amino-3-ketobutyrate)   | AK013138  | 26912        | 1.56 |
| 1418533_s_at | frizzled homolog 2 (Drosophila)                        | BB371406  | 57265        | 1.56 |
| 1418758_a_at | pleckstrin homology, Sec7 and coiled-coil domains      | NM_011182 | 19159        | 1.56 |
| 1419872_at   | gb:AI323359 /DB_XREF=gi:4057788 /DB_XREF=n             | AI323359  |              | 1.56 |
| 1423130_a_at | splicing factor, arginine/serine-rich 5 (SRp40, HRS)   | AW212917  | 20384        | 1.56 |
| 1423694_at   | potassium channel tetramerisation domain containi      | BC006935  | 330171       | 1.56 |
| 1424105_a_at | pituitary tumor-transforming 1                         | AF069051  | 30939        | 1.56 |

|              |                                                                      |           |              |      |
|--------------|----------------------------------------------------------------------|-----------|--------------|------|
| 1424965_at   | leupaxin                                                             | BC026563  | 107321       | 1.56 |
| 1426372_a_at | blocked early in transport 1 homolog (S. cerevisiae)                 | BE686988  | 54399        | 1.56 |
| 1434045_at   | Cyclin-dependent kinase inhibitor 1B (P27)                           | BB354528  | 12576        | 1.56 |
| 1435335_a_at | basic domain/leucine zipper transcription factor                     | BG144467  | 432486       | 1.56 |
| 1438546_x_at | solute carrier family 25 (mitochondrial carrier, adenine nucleotide) | C81442    | 11740 /// 43 | 1.56 |
| 1448324_at   | ribonucleic acid binding protein S1                                  | NM_009070 | 19826        | 1.56 |
| 1448395_at   | secreted frizzled-related sequence protein 1                         | BI658627  | 20377        | 1.56 |
| 1448742_at   | snail homolog 1 (Drosophila)                                         | NM_011427 | 20613        | 1.56 |
| 1449009_at   | T-cell specific GTPase                                               | NM_011579 | 21822        | 1.56 |
| 1449047_at   | RIKEN cDNA 1600020H07 gene                                           | NM_019975 | 56794        | 1.56 |
| 1450344_a_at | prostaglandin E receptor 3 (subtype EP3)                             | NM_011196 | 19218        | 1.56 |
| 1450496_a_at | RIKEN cDNA 2810433K01 gene                                           | NM_025581 | 66468        | 1.56 |
| 1451119_a_at | fibulin 1                                                            | BC007140  | 14114        | 1.56 |
| 1451932_a_at | thrombospondin repeat containing 1                                   | BC016215  | 229595       | 1.56 |
| 1453175_at   | zinc finger protein 50                                               | AK013374  | 109929       | 1.56 |
| 1460288_a_at | protein phosphatase 4, catalytic subunit                             | NM_019674 | 56420        | 1.56 |
| 1415776_at   | gb:NM_007437.1 /DB_XREF=gi:6680677 /GEN=AI                           | NM_007437 |              | 1.55 |
| 1416251_at   | minichromosome maintenance deficient 6 (MIS5 homolog)                | NM_008567 | 17219        | 1.55 |
| 1416389_a_at | chromosome condensation 1-like                                       | NM_134083 | 105670       | 1.55 |
| 1416415_a_at | H2A histone family, member Z                                         | AY074806  | 51788        | 1.55 |
| 1417694_at   | growth factor receptor bound protein 2-associated protein 1          | NM_021356 | 14388        | 1.55 |
| 1417879_at   | RIKEN cDNA 1110060M21 gene                                           | NM_025424 | 66208        | 1.55 |
| 1418580_at   | gb:NM_023386.1 /DB_XREF=gi:12963656 /GEN=EMBL                        | BC024872  |              | 1.55 |
| 1418627_at   | glutamate-cysteine ligase , modifier subunit                         | NM_008129 | 14630        | 1.55 |
| 1421385_a_at | myosin VIIa                                                          | NM_008663 | 17921        | 1.55 |
| 1421911_at   | signal transducer and activator of transcription 2                   | AF088862  | 20847        | 1.55 |
| 1422520_at   | neurofilament 3, medium                                              | NM_008691 | 18040        | 1.55 |
| 1422559_at   | ubiquitin-conjugating enzyme E2N                                     | AY039837  | 93765        | 1.55 |
| 1423484_at   | bicaudal C homolog 1 (Drosophila)                                    | BM217996  | 83675        | 1.55 |
| 1423566_a_at | heat shock protein 105                                               | BI499717  | 15505        | 1.55 |
| 1424045_at   | RIKEN cDNA 5730437N04 gene                                           | BC019420  | 70544        | 1.55 |
| 1424659_at   | slit homolog 2 (Drosophila)                                          | BG963150  | 20563        | 1.55 |
| 1425810_a_at | cysteine and glycine-rich protein 1                                  | BF124540  | 13007        | 1.55 |
| 1433711_s_at | Sestrin 1                                                            | BG076140  | 140742       | 1.55 |
| 1433830_at   | heterogeneous nuclear ribonucleoprotein A2/B1                        | BG064117  | 53379        | 1.55 |
| 1434846_at   | RIKEN cDNA 1700065A05 gene                                           | AW557010  | 329877       | 1.55 |
| 1436172_at   | hypothetical protein 9530028C05                                      | BQ175154  | 330256       | 1.55 |
| 1436874_x_at | solute carrier family 25 (mitochondrial carrier, adenine nucleotide) | BM210336  | 11740        | 1.55 |
| 1448557_at   | RIKEN cDNA 1200015N20 gene                                           | NM_024244 | 71721        | 1.55 |
| 1449061_a_at | DNA primase, p49 subunit                                             | J04620    | 19075        | 1.55 |
| 1450020_at   | chemokine (C-X3-C) receptor 1                                        | BC012653  | 13051        | 1.55 |
| 1450632_at   | ras homolog gene family, member A                                    | AF178958  | 11848        | 1.55 |
| 1451253_at   | PX domain containing serine/threonine kinase                         | BC016131  | 218699       | 1.55 |
| 1451271_a_at | acetyl-Coenzyme A acetyltransferase 1                                | BG070487  | 110446       | 1.55 |
| 1452021_a_at | hairy and enhancer of split 6 (Drosophila)                           | AF247040  | 55927        | 1.55 |
| 1452024_a_at | LIM domain binding 1                                                 | AF030333  | 16825        | 1.55 |
| 1452080_a_at | testis derived transcript 3, pseudogene                              | BE851193  | 54339        | 1.55 |
| 1415873_a_at | ARP1 actin-related protein 1 homolog A (yeast)                       | NM_016860 | 54130        | 1.54 |
| 1416186_at   | proline-rich nuclear receptor coactivator 2                          | NM_026383 | 52830        | 1.54 |
| 1416746_at   | H2A histone family, member X                                         | NM_010436 | 15270        | 1.54 |
| 1417533_a_at | integrin beta 5                                                      | NM_010580 | 16419        | 1.54 |
| 1417728_at   | methyl-CpG binding domain protein 3                                  | NM_013595 | 17192        | 1.54 |
| 1417868_a_at | cathepsin Z                                                          | NM_022325 | 64138        | 1.54 |

|              |                                                         |           |              |      |
|--------------|---------------------------------------------------------|-----------|--------------|------|
| 1419838_s_at | polo-like kinase 4 (Drosophila)                         | AI385771  | 20873        | 1.54 |
| 1420922_at   | ubiquitin specific protease 9, X chromosome /// sim     | AW107303  | 22284 /// 43 | 1.54 |
| 1421817_at   | glutathione reductase 1                                 | AK019177  | 14782        | 1.54 |
| 1422763_at   | regulator of G-protein signaling 19 interacting prote   | NM_018771 | 67903        | 1.54 |
| 1423140_at   | lysosomal acid lipase 1                                 | AI596237  | 16889        | 1.54 |
| 1423479_at   | RIKEN cDNA 150002M01 gene                               | AK005123  | 68979        | 1.54 |
| 1423681_at   | RIKEN cDNA 1300018I05 gene                              | AK005044  | 74157        | 1.54 |
| 1423818_a_at | ADP-ribosylation factor-like 6 interacting protein 1    | AF133669  | 54208        | 1.54 |
| 1423940_at   | Yip1 interacting factor homolog (S. cerevisiae)         | BC011117  | 68090        | 1.54 |
| 1424033_at   | splicing factor, arginine/serine-rich 7                 | BC014857  | 225027       | 1.54 |
| 1424382_at   | reticulocalbin 3, EF-hand calcium binding domain        | BC025602  | 52377        | 1.54 |
| 1424570_at   | DEAD (Asp-Glu-Ala-Asp) box polypeptide 46               | BF023426  | 212880       | 1.54 |
| 1424616_s_at | FGF receptor activating protein 1                       | BG063931  | 233575       | 1.54 |
| 1425930_a_at | transcription factor-like 4                             | AF213670  | 21428        | 1.54 |
| 1427086_at   | gb:AK019479.1 /DB_XREF=gi:12859711 /GEN=Sli             | BM570006  |              | 1.54 |
| 1427504_s_at | splicing factor, arginine/serine-rich 2 (SC-35)         | AF250133  | 20382        | 1.54 |
| 1428868_a_at | ornithine decarboxylase antizyme                        | BG094492  | 18245        | 1.54 |
| 1432094_a_at | RIKEN cDNA 1700034M03 gene                              | AK006602  | 73288        | 1.54 |
| 1433758_at   | nischarin                                               | BB025231  | 64652        | 1.54 |
| 1436567_a_at | NADH dehydrogenase (ubiquinone) 1 alpha subcor          | C88880    | 66416        | 1.54 |
| 1437432_a_at | tripartite motif protein 12                             | BM244351  | 76681        | 1.54 |
| 1448314_at   | cell division cycle 2 homolog A (S. pombe)              | NM_007659 | 12534        | 1.54 |
| 1448692_at   | ubiquilin 4                                             | BB764994  | 94232        | 1.54 |
| 1449145_a_at | caveolin, caveolae protein 1                            | AB029929  | 12389        | 1.54 |
| 1451180_a_at | RIKEN cDNA C330027I04 gene                              | BC015307  | 68106        | 1.54 |
| 1452346_at   | UDP-GlcNAc:betaGal beta-1,3-N-acetylglucosamin          | AV032053  | 108902       | 1.54 |
| 1452545_a_at | integrin beta 1 (fibronectin receptor beta)             | U37029    | 16412        | 1.54 |
| 1454036_a_at | ubiquitin specific protease 15                          | AK014891  | 14479        | 1.54 |
| 1415973_at   | Myristoylated alanine rich protein kinase C substrat    | AW546141  | 17118        | 1.53 |
| 1416246_a_at | coronin, actin binding protein 1A                       | BC002136  | 12721        | 1.53 |
| 1416308_at   | UDP-glucose dehydrogenase                               | NM_009466 | 22235        | 1.53 |
| 1416558_at   | maternal embryonic leucine zipper kinase                | NM_010790 | 17279        | 1.53 |
| 1416701_at   | ras homolog gene family, member E                       | BC009002  | 74194        | 1.53 |
| 1417189_at   | proteasome (prosome, macropain) 28 subunit, beta        | NM_011190 | 19188        | 1.53 |
| 1418015_at   | pumilio 2 (Drosophila)                                  | BI689507  | 80913        | 1.53 |
| 1419165_at   | zinc finger protein 260                                 | D45210    | 26466        | 1.53 |
| 1419548_at   | karyopherin (importin) alpha 1                          | U20619    | 16646        | 1.53 |
| 1420752_at   | deltex 3 homolog (Drosophila)                           | NM_030714 | 80904        | 1.53 |
| 1421731_a_at | flap structure specific endonuclease 1                  | NM_007999 | 14156        | 1.53 |
| 1421867_at   | nuclear receptor subfamily 3, group C, member 1         | NM_008173 | 14815        | 1.53 |
| 1422016_a_at | centromere autoantigen H                                | BC025084  | 26886        | 1.53 |
| 1422440_at   | cyclin-dependent kinase 4                               | NM_009870 | 12567        | 1.53 |
| 1422516_a_at | fibroblast growth factor (acidic) intracellular binding | NM_021438 | 58249        | 1.53 |
| 1423972_at   | electron transferring flavoprotein, alpha polypeptide   | BC003432  | 110842       | 1.53 |
| 1424156_at   | retinoblastoma-like 1 (p107)                            | U27177    | 19650        | 1.53 |
| 1424443_at   | transmembrane 6 superfamily member 1                    | AV378394  | 107769       | 1.53 |
| 1425487_at   | DNA segment, Chr 11, ERATO Doi 730, expressed           | BC025870  | 193116       | 1.53 |
| 1425927_a_at | activating transcription factor 5                       | AF375476  | 107503       | 1.53 |
| 1426999_at   | RIKEN cDNA 2700069A02 gene                              | BM198642  | 75553        | 1.53 |
| 1427108_at   | RIKEN cDNA 9530068E07 gene                              | BM233467  | 213673       | 1.53 |
| 1427181_at   | DNA segment, Chr 18, ERATO Doi 653, expressed           | BQ032363  | 52662        | 1.53 |
| 1427468_at   | protein phosphatase 3, catalytic subunit, beta isofo    | M81483    | 19056        | 1.53 |
| 1428061_at   | histone aminotransferase 1                              | AK014330  | 107435       | 1.53 |

|              |                                                                      |           |        |      |
|--------------|----------------------------------------------------------------------|-----------|--------|------|
| 1430542_a_at | solute carrier family 25 (mitochondrial carrier, adenine nucleotide) | AA823938  | 11740  | 1.53 |
| 1433429_at   | phosphatidylinositol glycan, class S                                 | BB309245  | 276846 | 1.53 |
| 1434089_at   | synaptopodin                                                         | BB426294  | 104027 | 1.53 |
| 1448143_at   | aldehyde dehydrogenase 2, mitochondrial                              | NM_009656 | 11669  | 1.53 |
| 1448258_a_at | signal peptidase complex subunit 1 homolog (S. cerevisiae)           | NM_026911 | 69019  | 1.53 |
| 1448335_s_at | cyclin I                                                             | NM_017367 | 12453  | 1.53 |
| 1450407_a_at | acidic (leucine-rich) nuclear phosphoprotein 32 family A member 1    | AF022957  | 11737  | 1.53 |
| 1450868_at   | DNA segment, Chr 8, ERATO Doi 354, expressed in HeLa cells           | BF468249  | 52120  | 1.53 |
| 1451489_at   | RIKEN cDNA 1810012H11 gene                                           | BC019996  | 71998  | 1.53 |
| 1453014_a_at | SEC31-like 1 (S. cerevisiae)                                         | BM222383  | 69162  | 1.53 |
| 1453406_a_at | RAB28, member RAS oncogene family                                    | AK012286  | 100972 | 1.53 |
| 1460180_at   | hexosaminidase B                                                     | NM_010422 | 15212  | 1.53 |
| 1415850_at   | RAS p21 protein activator 3                                          | NM_009025 | 19414  | 1.52 |
| 1416052_at   | phosphoribosyl pyrophosphate synthetase 1                            | AK011304  | 19139  | 1.52 |
| 1416208_at   | ubiquitin specific protease 14                                       | BC005571  | 59025  | 1.52 |
| 1416289_at   | procollagen-lysine, 2-oxoglutarate 5-dioxygenase 1                   | NM_011122 | 18822  | 1.52 |
| 1416315_at   | abhydrolase domain containing 4                                      | NM_134076 | 105501 | 1.52 |
| 1416757_at   | RIKEN cDNA 2310031L18 gene                                           | BC027435  | 68014  | 1.52 |
| 1416871_at   | a disintegrin and metalloprotease domain 8                           | NM_007403 | 11501  | 1.52 |
| 1418755_at   | T-box 15                                                             | NM_009323 | 21384  | 1.52 |
| 1421378_s_at | ATP-binding cassette, sub-family C (CFTR/MRP), member 1              | NM_008576 | 17250  | 1.52 |
| 1422514_at   | AE binding protein 1                                                 | NM_009636 | 11568  | 1.52 |
| 1422985_at   | frizzled homolog 1 (Drosophila)                                      | NM_021457 | 14362  | 1.52 |
| 1423078_a_at | sterol-C4-methyl oxidase-like                                        | AK005441  | 66234  | 1.52 |
| 1423335_at   | RIKEN cDNA 1110004F10 gene                                           | AW545354  | 56372  | 1.52 |
| 1423340_at   | transcription factor AP-2 beta                                       | AV334599  | 21419  | 1.52 |
| 1424857_a_at | tripartite motif protein 34                                          | AF220142  | 94094  | 1.52 |
| 1428076_s_at | NADH dehydrogenase (ubiquinone) 1 beta subcomplex 1                  | BG968046  | 68194  | 1.52 |
| 1428873_a_at | RIKEN cDNA 4121402D02 gene                                           | AW495537  | 74026  | 1.52 |
| 1428905_at   | Ras-related GTP binding A                                            | AI118026  | 68441  | 1.52 |
| 1429776_a_at | DnaJ (Hsp40) homolog, subfamily B, member 6                          | AK005680  | 23950  | 1.52 |
| 1433490_s_at | Erythrocyte protein band 4.1-like 2                                  | BE951907  | 13822  | 1.52 |
| 1437434_a_at | RIKEN cDNA 5031439A09 gene                                           | BM241735  | 68151  | 1.52 |
| 1438058_s_at | prostate tumor over expressed gene 1                                 | BG073526  | 84113  | 1.52 |
| 1448138_at   | protein phosphatase 2A, regulatory subunit B (PRIP)                  | NM_138748 | 110854 | 1.52 |
| 1448144_at   | heterogeneous nuclear ribonucleoprotein A/B                          | NM_010448 | 15384  | 1.52 |
| 1448780_at   | solute carrier family 12, member 2                                   | BG069505  | 20496  | 1.52 |
| 1449528_at   | c-fos induced growth factor                                          | NM_010216 | 14205  | 1.52 |
| 1449936_at   | RIKEN cDNA 8430419L09 gene                                           | NM_028982 | 74525  | 1.52 |
| 1450677_at   | checkpoint kinase 1 homolog (S. pombe)                               | NM_007691 | 12649  | 1.52 |
| 1450768_at   | discs, large homolog 1 (Drosophila)                                  | BQ176806  | 13383  | 1.52 |
| 1450814_a_at | importin 4                                                           | NM_024267 | 75751  | 1.52 |
| 1451036_at   | spastic paraplegia 21 homolog (human)                                | BB095517  | 27965  | 1.52 |
| 1451082_at   | RIKEN cDNA 1300018I05 gene                                           | AK005044  | 74157  | 1.52 |
| 1451086_s_at | RAS-related C3 botulinum substrate 1                                 | BC003828  | 19353  | 1.52 |
| 1451174_at   | RIKEN cDNA E430025L02 gene                                           | BC027411  | 224109 | 1.52 |
| 1452016_at   | arachidonate 5-lipoxygenase activating protein                       | BC026209  | 11690  | 1.52 |
| 1452026_a_at | phospholipase A2, group XIA                                          | AY007382  | 66350  | 1.52 |
| 1452174_at   | Sterol regulatory element binding factor 2                           | BM123132  | 20788  | 1.52 |
| 1452365_at   | RIKEN cDNA 4732435N03 gene                                           | AV371987  | 234356 | 1.52 |
| 1452660_s_at | kelch-like 7 (Drosophila)                                            | AK012326  | 52323  | 1.52 |
| 1452768_at   | testis expressed gene 261                                            | AK013971  | 21766  | 1.52 |
| 1453849_s_at | heterogeneous nuclear ribonucleoprotein A/B                          | AK013709  | 15384  | 1.52 |

|              |                                                        |           |              |       |
|--------------|--------------------------------------------------------|-----------|--------------|-------|
| 1416031_s_at | minichromosome maintenance deficient 7 (S. cerevisiae) | NM_008568 | 17220        | 1.51  |
| 1416452_at   | ornithine aminotransferase                             | BC008119  | 18242        | 1.51  |
| 1417238_at   | Ewing sarcoma breakpoint region 1                      | NM_007968 | 14030        | 1.51  |
| 1417601_at   | regulator of G-protein signaling 1                     | NM_015811 | 50778        | 1.51  |
| 1418194_at   | UDP-N-acetyl-alpha-D-galactosamine:polypeptide 1       | BG965198  | 171212       | 1.51  |
| 1418279_a_at | A kinase (PRKA) anchor protein 1                       | BG067335  | 11640        | 1.51  |
| 1419132_at   | toll-like receptor 2                                   | NM_011905 | 24088        | 1.51  |
| 1419259_at   | gb:NM_009105.1 /DB_XREF=gi:6677824 /GEN=R:             | NM_009105 |              | 1.51  |
| 1420886_a_at | X-box binding protein 1                                | NM_013842 | 22433        | 1.51  |
| 1421534_at   | gb:NM_008016.1 /DB_XREF=gi:6679796 /GEN=Fi             | NM_008016 |              | 1.51  |
| 1422814_at   | calmodulin binding protein 1                           | NM_009791 | 12316        | 1.51  |
| 1423951_at   | RIKEN cDNA 1110025109 gene                             | BC024620  | 68634        | 1.51  |
| 1426028_a_at | citron                                                 | AF086823  | 12704        | 1.51  |
| 1426078_a_at | G protein-coupled receptor 108                         | AF376726  | 78308        | 1.51  |
| 1426195_a_at | cystatin C                                             | AF483486  | 13010        | 1.51  |
| 1427056_at   | a disintegrin-like and metalloprotease (reprolysin ty  | AV228731  | 235130       | 1.51  |
| 1427253_s_at | suppressor of zeste 12 homolog (Drosophila)            | BG066534  | 52615        | 1.51  |
| 1428235_at   | succinate dehydrogenase complex, subunit D, inte       | AK013962  | 66925        | 1.51  |
| 1429239_a_at | StAR-related lipid transfer (START) domain contain     | AK014587  | 170459       | 1.51  |
| 1433665_at   | vacuolar protein sorting 41 (yeast)                    | AW536822  | 218035       | 1.51  |
| 1436393_a_at | tripartite motif protein 37                            | BG065227  | 68729        | 1.51  |
| 1448185_at   | homocysteine-inducible, endoplasmic reticulum stre     | NM_022331 | 64209        | 1.51  |
| 1450928_at   | inhibitor of DNA binding 4                             | BB121406  | 15904        | 1.51  |
| 1460436_at   | N-deacetylase/N-sulfotransferase (heparan glucos       | BI652065  | 15531        | 1.51  |
| 1416136_at   | matrix metalloproteinase 2                             | NM_008610 | 17390        | 1.5   |
| 1417268_at   | CD14 antigen                                           | NM_009841 | 12475        | 1.5   |
| 1419663_at   | osteoglycin                                            | BB542051  | 18295        | 1.5   |
| 1422847_a_at | protein kinase C, delta                                | AF251036  | 18753        | 1.5   |
| 1424318_at   | RIKEN cDNA 1110067D22 gene                             | BC019131  | 216551       | 1.5   |
| 1425526_a_at | paired related homeobox 1                              | L06502    | 18933        | 1.5   |
| 1425676_a_at | elongation of very long chain fatty acids (FEN1/Elo    | BC006735  | 54325        | 1.5   |
| 1427058_at   | eukaryotic translation initiation factor 4A1           | AK010644  | 13681        | 1.5   |
| 1430811_a_at | cell division cycle associated 1                       | AK010351  | 66977        | 1.5   |
| 1431226_a_at | fibronectin type III domain containing 4               | AK013203  | 64339        | 1.5   |
| 1434366_x_at | complement component 1, q subcomponent, beta           | AW227993  | 12260        | 1.5   |
| 1449875_s_at | histocompatibility 2, T region locus 10 /// histocomp  | NM_010395 | 15024 /// 15 | 1.5   |
| 1449930_a_at | signal sequence receptor, beta                         | NM_025448 | 66256        | 1.5   |
| 1452296_at   | slit homolog 3 (Drosophila)                            | BM570006  | 20564        | 1.5   |
| 1456383_at   | RIKEN cDNA 2410005K20 gene                             | BM239987  | 66409        | 1.5   |
| 1417883_at   | glutathione S-transferase, theta 2                     | BC012707  | 14872        | -1.5  |
| 1421050_at   | DNA segment, Chr 11, Wayne State University 68,        | NM_026776 | 28084        | -1.5  |
| 1422592_at   | catenin delta 2                                        | NM_008729 | 18163        | -1.5  |
| 1427364_a_at | ornithine decarboxylase, structural 1                  | S64539    | 18263        | -1.5  |
| 1437477_at   | leucine rich repeat (in FLII) interacting protein 1    | AV301584  | 16978        | -1.5  |
| 1449957_at   | protein tyrosine phosphatase, receptor type, V         | NM_007955 | 13924        | -1.5  |
| 1451699_at   | MRNA similar to RIKEN cDNA 9030624G23 gene (           | BC024416  |              | -1.5  |
| 1418289_at   | nestin                                                 | AI413223  | 18008        | -1.51 |
| 1418852_at   | cholinergic receptor, nicotinic, alpha polypeptide 1 ( | NM_007389 | 11435        | -1.51 |
| 1421309_at   | O-6-methylguanine-DNA methyltransferase                | NM_008598 | 17314        | -1.51 |
| 1424598_at   | DEAD (Asp-Glu-Ala-Asp) box polypeptide 6               | BC021452  | 13209        | -1.51 |
| 1424893_at   | nuclear distribution gene E-like homolog 1 (A. nidul   | BC021434  | 83431        | -1.51 |
| 1424940_s_at | cDNA sequence BC022687                                 | BC022687  | 217887       | -1.51 |
| 1427104_at   | zinc finger protein 612                                | BG076162  | 234725       | -1.51 |

|              |                                                         |           |              |       |
|--------------|---------------------------------------------------------|-----------|--------------|-------|
| 1434537_at   | Solute carrier organic anion transporter family, men    | BM237089  | 108116       | -1.51 |
| 1439295_x_at | hypothetical LOC434179                                  | BB371300  | 434179       | -1.51 |
| 1451629_at   | limb-bud and heart                                      | BC026827  | 77889        | -1.51 |
| 1452320_at   | similar to low density lipoprotein receptor-related pr  | C80829    | 381369 /// 4 | -1.51 |
| 1456011_x_at | acetyl-Coenzyme A acyltransferase 1                     | BB210491  | 113868       | -1.51 |
| 1416298_at   | matrix metalloproteinase 9                              | NM_013599 | 17395        | -1.52 |
| 1416811_s_at | cytotoxic T lymphocyte-associated protein 2 alpha /     | NM_007796 | 13024 /// 13 | -1.52 |
| 1419624_a_at | RIKEN cDNA 1700010I14 gene                              | NM_025851 | 66931        | -1.52 |
| 1420416_at   | sema domain, immunoglobulin domain (Ig), short b.       | NM_009152 | 20346        | -1.52 |
| 1420664_s_at | protein C receptor, endothelial                         | NM_011171 | 19124        | -1.52 |
| 1420989_at   | RIKEN cDNA 4933411K20 gene                              | NM_025747 | 66756        | -1.52 |
| 1434987_at   | aldehyde dehydrogenase 2, mitochondrial                 | AI462635  | 11669        | -1.52 |
| 1436343_at   | chromodomain helicase DNA binding protein 4             | BM502696  | 107932       | -1.52 |
| 1437100_x_at | proviral integration site 3                             | BB206220  | 223775       | -1.52 |
| 1437848_x_at | ADP-dependent glucokinase                               | BB490673  | 72141        | -1.52 |
| 1449078_at   | ST3 beta-galactoside alpha-2,3-sialyltransferase 6      | NM_018784 | 54613        | -1.52 |
| 1449852_a_at | EH-domain containing 4                                  | NM_133838 | 98878        | -1.52 |
| 1419689_at   | glypican 6                                              | BC023448  | 23888        | -1.53 |
| 1420532_at   | activin receptor interacting protein 1                  | NM_015823 | 50791        | -1.53 |
| 1421354_at   | protein kinase, cGMP-dependent, type II                 | NM_008926 | 19092        | -1.53 |
| 1422948_s_at | histone 1, H4h /// histone 1, H4c /// histone 1, H4i // | NM_013550 | 319155 /// 3 | -1.53 |
| 1423071_x_at | gb:AW549928 /DB_XREF=gi:7195356 /DB_XREF= AW549928      |           |              | -1.53 |
| 1423696_a_at | gb:BC006869.1 /DB_XREF=gi:13905153 /FEA=FLI             | BC006869  |              | -1.53 |
| 1424699_at   | RIKEN cDNA 4921511K06 gene                              | BC006583  | 232664       | -1.53 |
| 1425271_at   | proteasome (prosome, macropain) 26S subunit, AT         | AB000121  | 19183        | -1.53 |
| 1431980_a_at | arsenic (+3 oxidation state) methyltransferase          | AK009814  | 57344        | -1.53 |
| 1436990_s_at | Nur77 downstream gene 2                                 | AA038464  | 103172       | -1.53 |
| 1449357_at   | RIKEN cDNA 2310030G06 gene                              | NM_025865 | 66952        | -1.53 |
| 1452590_a_at | hypothetical LOC211623                                  | BB609699  | 211623       | -1.53 |
| 1416379_at   | pannexin 1                                              | NM_019482 | 55991        | -1.54 |
| 1416689_at   | tuffelin 1                                              | NM_011656 | 22156        | -1.54 |
| 1418285_at   | ephrin B1                                               | NM_010110 | 13641        | -1.54 |
| 1419712_at   | interleukin 3 receptor, alpha chain                     | NM_008369 | 16188        | -1.54 |
| 1423537_at   | growth associated protein 43                            | BB622036  | 14432        | -1.54 |
| 1425652_s_at | RNA binding protein gene with multiple splicing         | AF148511  | 19663        | -1.54 |
| 1425983_x_at | homeodomain interacting protein kinase 2                | AF208292  | 15258        | -1.54 |
| 1426725_s_at | E26 avian leukemia oncogene 1, 5' domain                | BB151715  | 23871        | -1.54 |
| 1428935_at   | calnexin                                                | AI988026  | 12330        | -1.54 |
| 1437218_at   | fibronectin 1                                           | BM234360  | 14268        | -1.54 |
| 1438415_s_at | RIKEN cDNA 1300010K09 gene                              | AV166218  | 74766        | -1.54 |
| 1448894_at   | aldo-keto reductase family 1, member B8                 | NM_008012 | 14187        | -1.54 |
| 1455505_at   | Transcribed locus                                       | AI840824  |              | -1.54 |
| 1455893_at   | RIKEN cDNA 2610028F08 gene                              | BG067392  | 239405       | -1.54 |
| 1416357_a_at | melanoma cell adhesion molecule                         | NM_023061 | 84004        | -1.55 |
| 1417022_at   | solute carrier family 7 (cationic amino acid transpor   | NM_007515 | 11989        | -1.55 |
| 1417853_at   | chloride channel calcium activated 1 /// chloride ch    | AF047838  | 12722 /// 80 | -1.55 |
| 1420991_at   | ankyrin repeat domain 1 (cardiac muscle)                | AK009959  | 107765       | -1.55 |
| 1422573_at   | gb:D85596.1 /DB_XREF=gi:2094764 /GEN=AMPD               | D85596    |              | -1.55 |
| 1422809_at   | regulating synaptic membrane exocytosis 2               | NM_053271 | 116838       | -1.55 |
| 1423506_a_at | neuronatin                                              | AV218841  | 18111        | -1.55 |
| 1425268_a_at | RIKEN cDNA 3110045G13 gene                              | BB752266  | 73182        | -1.55 |
| 1425357_a_at | gremlin 1                                               | BC015293  | 23892        | -1.55 |
| 1438982_s_at | RIKEN cDNA 2810417J12 gene                              | BB251185  | 76917        | -1.55 |

|              |                                                     |           |        |       |
|--------------|-----------------------------------------------------|-----------|--------|-------|
| 1448154_at   | N-myc downstream regulated gene 2                   | NM_013864 | 29811  | -1.55 |
| 1449591_at   | caspase 11, apoptosis-related cysteine protease     | NM_007609 | 12363  | -1.55 |
| 1449982_at   | interleukin 11                                      | NM_008350 | 16156  | -1.55 |
| 1418835_at   | pleckstrin homology-like domain, family A, member   | NM_009344 | 21664  | -1.56 |
| 1419766_at   | SNF1-like kinase                                    | NM_010831 | 17691  | -1.56 |
| 1424471_at   | Rap guanine nucleotide exchange factor (GEF) 3      | BC020532  | 223864 | -1.56 |
| 1428882_at   | RIKEN cDNA 2510001110 gene                          | AK010881  | 74781  | -1.56 |
| 1431024_a_at | AT rich interactive domain 4B (Rbp1 like)           | AK020165  | 94246  | -1.56 |
| 1450744_at   | elongation factor RNA polymerase II 2               | NM_138953 | 192657 | -1.56 |
| 1452304_a_at | Rho guanine nucleotide exchange factor (GEF) 5      | BC025127  | 54324  | -1.56 |
| 1452391_at   | coxsackievirus and adenovirus receptor              | AK004908  | 13052  | -1.56 |
| 1415824_at   | stearoyl-Coenzyme A desaturase 2                    | BG060909  | 20250  | -1.57 |
| 1419457_at   | Rho-guanine nucleotide exchange factor              | BG069493  | 110596 | -1.57 |
| 1419806_at   | high density lipoprotein (HDL) binding protein      | C77256    | 110611 | -1.57 |
| 1421201_a_at | trophinin                                           | AF241244  | 56191  | -1.57 |
| 1424376_at   | CDC42 effector protein (Rho GTPase binding) 1       | BC016250  | 104445 | -1.57 |
| 1424612_at   | RIKEN cDNA 9330161F08 gene                          | BC016107  | 223473 | -1.57 |
| 1425837_a_at | CCR4 carbon catabolite repression 4-like (S. cerev  | AF199491  | 12457  | -1.57 |
| 1449553_at   | RIKEN cDNA 2610200G18 gene                          | AK009389  | 67149  | -1.57 |
| 1451660_a_at | homeo box B6                                        | BC016893  | 15414  | -1.57 |
| 1417034_at   | RIKEN cDNA 1810073E21 gene                          | NM_025960 | 67091  | -1.58 |
| 1417323_at   | RIKEN cDNA 5430413I02 gene                          | NM_019976 | 56742  | -1.58 |
| 1422803_at   | follistatin-like 3                                  | NM_031380 | 83554  | -1.58 |
| 1423489_at   | monocyte to macrophage differentiation-associated   | BC021914  | 67468  | -1.58 |
| 1424733_at   | purinergic receptor P2Y, G-protein coupled, 14      | AF177211  | 140795 | -1.58 |
| 1424801_at   | enabled homolog (Drosophila)                        | BQ044016  | 13800  | -1.58 |
| 1425148_a_at | sorting nexin 6                                     | BC025911  | 72183  | -1.58 |
| 1434196_at   | DnaJ (Hsp40) homolog, subfamily A, member 4         | BQ176119  | 58233  | -1.58 |
| 1448857_a_at | zinc finger, DHHC domain containing 12              | NM_025428 | 66220  | -1.58 |
| 1449283_a_at | mitogen-activated protein kinase 12                 | BC021640  | 29857  | -1.58 |
| 1451245_at   | leucine rich repeat containing 3B                   | BC019794  | 218763 | -1.58 |
| 1452180_at   | PHD finger protein 17                               | BG065238  | 269424 | -1.58 |
| 1452412_at   | homeo box C8                                        | BB283726  | 15426  | -1.58 |
| 1454890_at   | angiominin                                          | BG067039  | 27494  | -1.58 |
| 1425274_at   | gb:AF221854.1 /DB_XREF=gi:12655824 /FEA=FLr         | AF289490  |        | -1.59 |
| 1425964_x_at | heat shock protein 1                                | U03561    | 15507  | -1.59 |
| 1450541_at   | plasmacytoma variant translocation 1                | NM_011222 | 19296  | -1.59 |
| 1451615_at   | cDNA sequence BC026374                              | BC026374  | 234677 | -1.59 |
| 1459021_at   | gb:BB307071 /DB_XREF=gi:16402263 /DB_XREF: BB307071 |           |        | -1.59 |
| 1417483_at   | nuclear factor of kappa light polypeptide gene enha | AB026551  | 80859  | -1.6  |
| 1418429_at   | kinesin family member 5B                            | BI328541  | 16573  | -1.6  |
| 1419300_at   | FMS-like tyrosine kinase 1                          | NM_010228 | 14254  | -1.6  |
| 1420010_at   | CDNA, clone:Y0G0116J03, strand:plus, reference:f    | C80083    |        | -1.6  |
| 1425673_at   | LIM domain containing preferred translocation part  | BC005613  | 210126 | -1.6  |
| 1426165_a_at | caspase 3, apoptosis related cysteine protease      | D86352    | 12367  | -1.6  |
| 1435866_s_at | histone 3, H2a                                      | AV297651  | 319162 | -1.6  |
| 1448728_a_at | nuclear factor of kappa light polypeptide gene enha | AB026551  | 80859  | -1.6  |
| 1449352_at   | polymerase (DNA directed), lambda                   | NM_020032 | 56626  | -1.6  |
| 1449752_at   | gb:AI596360 /DB_XREF=gi:4605408 /DB_XREF=n          | AI596360  |        | -1.6  |
| 1416779_at   | serum deprivation response                          | BE197945  | 20324  | -1.61 |
| 1423310_at   | trophoblast glycoprotein                            | BQ177165  | 21983  | -1.61 |
| 1424150_at   | cDNA sequence BC024955                              | BC024955  | 233552 | -1.61 |
| 1437835_a_at | RIKEN cDNA 0610011L14 gene                          | BB357560  | 68295  | -1.61 |

|              |                                                          |           |              |       |
|--------------|----------------------------------------------------------|-----------|--------------|-------|
| 1449152_at   | cyclin-dependent kinase inhibitor 2B (p15, inhibits C    | AF059567  | 12579        | -1.61 |
| 1450766_at   | phosphodiesterase 6H, cGMP-specific, cone, gamr          | NM_023898 | 78600        | -1.61 |
| 1418509_at   | carbonyl reductase 2                                     | BC010758  | 12409        | -1.62 |
| 1418937_at   | deiodinase, iodothyronine, type II                       | AF177196  | 13371        | -1.62 |
| 1424829_at   | RIKEN cDNA A830007P12 gene                               | BC013092  | 227612       | -1.62 |
| 1425558_at   | kinesin light chain 3                                    | BC017147  | 232943       | -1.62 |
| 1425603_at   | RIKEN cDNA 0610011104 gene                               | BC006049  | 66058        | -1.62 |
| 1428794_at   | RIKEN cDNA 2810012G08 gene                               | BQ175052  | 76364        | -1.62 |
| 1429787_x_at | ZW10 interactor                                          | AK008144  | 52696        | -1.62 |
| 1431170_at   | ephrin A3                                                | AA388313  | 13638        | -1.62 |
| 1449311_at   | BTB and CNC homology 1                                   | NM_007520 | 12013        | -1.62 |
| 1451474_a_at | poly (ADP-ribose) polymerase family, member 8            | BC022679  | 52552        | -1.62 |
| 1420329_at   | RIKEN cDNA 4930455C21 gene                               | NM_024273 | 76916        | -1.63 |
| 1420851_at   | par-6 partitioning defective 6 homolog gamma (C. ε       | NM_053117 | 93737        | -1.63 |
| 1422545_at   | T-box 2                                                  | NM_009324 | 21385        | -1.63 |
| 1424854_at   | histone 1, H4f /// histone 1, H4i /// histone 1, H4m //  | BC019757  | 319157 /// 3 | -1.63 |
| 1429692_s_at | GTP cyclohydrolase 1                                     | BB698398  | 14528        | -1.63 |
| 1434958_at   | Similar to saccin                                        | BG075163  | 432862       | -1.63 |
| 1435252_at   | UDP-Gal:betaGal beta 1,3-galactosyltransferase, p        | AV328064  | 117592       | -1.63 |
| 1449563_at   | contactin 1                                              | NM_007727 | 12805        | -1.63 |
| 1451498_at   | cDNA sequence BC004853                                   | BC004853  | 227618       | -1.63 |
| 1422168_a_at | brain derived neurotrophic factor                        | AY057913  | 12064        | -1.64 |
| 1435137_s_at | RIKEN cDNA 1200015M12 gene                               | BB119177  | 71739        | -1.64 |
| 1448508_at   | expressed sequence AI429613                              | NM_134000 | 103213       | -1.64 |
| 1450781_at   | high mobility group AT-hook 2                            | X58380    | 15364        | -1.64 |
| 1451287_s_at | RIKEN cDNA 2810003C17 gene                               | BC024599  | 108897       | -1.64 |
| 1417374_at   | tubulin, alpha 4                                         | AW491660  | 22145        | -1.65 |
| 1421117_at   | dystonin                                                 | NM_010081 | 13518        | -1.65 |
| 1451751_at   | DNA-damage-inducible transcript 4-like                   | AF335325  | 73284        | -1.65 |
| 1419458_at   | Rho-guanine nucleotide exchange factor                   | BG069493  | 110596       | -1.66 |
| 1421895_at   | eukaryotic translation initiation factor 2, subunit 3, s | NM_012010 | 26905        | -1.66 |
| 1422155_at   | histone 2, H3c2                                          | BC015270  | 97114        | -1.66 |
| 1427321_s_at | coxsackievirus and adenovirus receptor                   | AK004908  | 13052        | -1.66 |
| 1439388_s_at | breast cancer anti-estrogen resistance 1                 | BB251739  | 12927        | -1.66 |
| 1455265_a_at | gb:BB100249 /DB_XREF=gi:8752817 /DB_XREF=                | BB100249  |              | -1.66 |
| 1416927_at   | transformation related protein 53 inducible nuclear      | AW495711  | 60599        | -1.67 |
| 1417311_at   | cysteine rich protein 2                                  | NM_024223 | 68337        | -1.67 |
| 1422169_a_at | brain derived neurotrophic factor                        | AY057913  | 12064        | -1.67 |
| 1422945_a_at | kinesin family member 5C                                 | AI844677  | 16574        | -1.67 |
| 1424470_a_at | Rap guanine nucleotide exchange factor (GEF) 3           | BC020532  | 223864       | -1.67 |
| 1426472_at   | zinc finger protein 52                                   | BM225280  | 22710        | -1.67 |
| 1417373_a_at | tubulin, alpha 4                                         | AW491660  | 22145        | -1.68 |
| 1422947_at   | histone 1, H4f /// histone 1, H4i /// histone 1, H4m //  | NM_013550 | 319157 /// 3 | -1.68 |
| 1427482_a_at | carbonic anhydrase 8                                     | X61397    | 12319        | -1.68 |
| 1437012_x_at | Rap guanine nucleotide exchange factor (GEF) 3           | BB226235  | 223864       | -1.68 |
| 1438789_s_at | dihydropyrimidinase-like 3                               | AV161550  | 22240        | -1.68 |
| 1451999_at   | LIM domain binding 3                                     | AF114378  | 24131        | -1.68 |
| 1452436_at   | lysyl oxidase-like 2                                     | AF117951  | 94352        | -1.68 |
| 1423277_at   | protein tyrosine phosphatase, receptor type, K           | AI893646  | 19272        | -1.69 |
| 1423488_at   | monocyte to macrophage differentiation-associated        | BC021914  | 67468        | -1.69 |
| 1448024_at   | RIKEN cDNA B430320C24 gene                               | BG080055  | 319900       | -1.69 |
| 1449033_at   | tumor necrosis factor receptor superfamily, membe        | AB013898  | 18383        | -1.69 |
| 1421053_at   | kinesin family member 1A                                 | NM_008440 | 16560        | -1.7  |



|              |                                                            |           |        |       |
|--------------|------------------------------------------------------------|-----------|--------|-------|
| 1418711_at   | platelet derived growth factor, alpha                      | BB371842  | 18590  | -1.71 |
| 1424863_a_at | homeodomain interacting protein kinase 2                   | AF170301  | 15258  | -1.71 |
| 1426910_at   | PRKC, apoptosis, WT1, regulator                            | BB398886  | 114774 | -1.71 |
| 1427633_a_at | Pregnancy-associated plasma protein A                      | AF439513  | 18491  | -1.71 |
| 1432281_a_at | integrin beta 6                                            | AK019511  | 16420  | -1.71 |
| 1438116_x_at | solute carrier family 9 (sodium/hydrogen exchanger         | BB805362  | 26941  | -1.71 |
| 1449193_at   | CD5 antigen-like                                           | NM_009690 | 11801  | -1.71 |
| 1422028_a_at | E26 avian leukemia oncogene 1, 5' domain                   | BC010588  | 23871  | -1.72 |
| 1424290_at   | cDNA sequence BC010311                                     | BB817847  | 209212 | -1.72 |
| 1426037_a_at | gb:U94828.1 /DB_XREF=gi:2605641 /GEN=RGS-r                 | U94828    |        | -1.72 |
| 1426930_at   | bruno-like 4, RNA binding protein (Drosophila)             | AV327653  | 108013 | -1.72 |
| 1449481_at   | solute carrier family 25 (mitochondrial carrier, adenine   | BC016571  | 50799  | -1.72 |
| 1453092_at   | RIKEN cDNA 2300002G24 gene                                 | AK009010  | 74175  | -1.72 |
| 1460670_at   | RIO kinase 3 (yeast)                                       | NM_024182 | 66878  | -1.72 |
| 1415932_x_at | ATPase, class II, type 9A                                  | NM_015731 | 11981  | -1.73 |
| 1420518_a_at | immunoglobulin superfamily, member 9                       | AF317839  | 93842  | -1.73 |
| 1422742_at   | human immunodeficiency virus type I enhancer binding       | NM_007772 | 110521 | -1.73 |
| 1426010_a_at | erythrocyte protein band 4.1-like 3                        | AF177146  | 13823  | -1.73 |
| 1452104_at   | RIKEN cDNA 2600005N12 gene                                 | BI456906  | 70317  | -1.73 |
| 1417917_at   | calponin 1                                                 | NM_009922 | 12797  | -1.74 |
| 1422751_at   | transducin-like enhancer of split 1, homolog of Drosophila | NM_011599 | 21885  | -1.74 |
| 1424800_at   | enabled homolog (Drosophila)                               | BQ044016  | 13800  | -1.74 |
| 1427539_a_at | ZW10 interactor                                            | BC013559  | 52696  | -1.74 |
| 1450786_x_at | PDZ and LIM domain 5                                       | NM_019808 | 56376  | -1.74 |
| 1418872_at   | ATP-binding cassette, sub-family B (MDR/TAP), member 1     | NM_011075 | 18669  | -1.75 |
| 1419613_at   | procollagen, type VII, alpha 1                             | NM_007738 | 12836  | -1.75 |
| 1438855_x_at | gb:BB233088 /DB_XREF=gi:8912943 /DB_XREF=                  | BB233088  |        | -1.75 |
| 1439376_x_at | gb:BB357590 /DB_XREF=gi:9069418 /DB_XREF=                  | BB357590  |        | -1.75 |
| 1417703_at   | poliovirus receptor-related 2                              | NM_008990 | 19294  | -1.76 |
| 1423988_at   | gb:BE373450 /DB_XREF=gi:9318813 /DB_XREF=                  | BE373450  |        | -1.76 |
| 1418076_at   | suppression of tumorigenicity 14 (colon carcinoma)         | NM_011176 | 19143  | -1.77 |
| 1418876_at   | forkhead box D1                                            | BB662927  | 15229  | -1.77 |
| 1450826_a_at | serum amyloid A 3                                          | NM_011315 | 20210  | -1.78 |
| 1454959_s_at | guanine nucleotide binding protein, alpha inhibiting       | BQ174580  | 14677  | -1.78 |
| 1421425_a_at | Down syndrome critical region gene 1-like 1                | NM_030598 | 53901  | -1.79 |
| 1422562_at   | Ras-related associated with diabetes                       | NM_019662 | 56437  | -1.79 |
| 1424008_a_at | RNA binding protein with multiple splicing 2               | BC021788  | 71973  | -1.79 |
| 1427485_at   | leiomodulin 1 (smooth muscle)                              | AF237627  | 93689  | -1.79 |
| 1418030_at   | solute carrier organic anion transporter family, member 1  | NM_023908 | 108116 | -1.8  |
| 1419719_at   | gamma-aminobutyric acid (GABA-A) receptor, subunit 1       | NM_008069 | 14400  | -1.8  |
| 1432156_a_at | ring finger protein 32                                     | AK012288  | 56874  | -1.8  |
| 1460511_at   | plakophilin 2                                              | AK004731  | 67451  | -1.8  |
| 1416023_at   | fatty acid binding protein 3, muscle and heart             | NM_010174 | 14077  | -1.81 |
| 1417023_a_at | fatty acid binding protein 4, adipocyte                    | NM_024406 | 11770  | -1.81 |
| 1420406_at   | paternally expressed 12                                    | NM_013788 | 27412  | -1.81 |
| 1435184_at   | RIKEN cDNA B430320C24 gene                                 | BG066982  | 319900 | -1.81 |
| 1433509_s_at | DNA segment, Chr 6, ERATO Doi 253, expressed               | BQ174328  | 52250  | -1.82 |
| 1452291_at   | centaurin, delta 1                                         | AV375176  | 212285 | -1.82 |
| 1423055_at   | neuron specific gene family member 1                       | NM_010942 | 18196  | -1.84 |
| 1424966_at   | transmembrane protein 40                                   | BC019416  | 94346  | -1.84 |
| 1427019_at   | protein tyrosine phosphatase, receptor type Z, polypeptide | BC002298  | 19283  | -1.84 |
| 1436853_a_at | synuclein, alpha                                           | AI324124  | 20617  | -1.84 |
| 1437170_x_at | PDZ and LIM domain 1 (elfin)                               | AV013697  | 54132  | -1.84 |

|              |                                                     |           |        |       |
|--------------|-----------------------------------------------------|-----------|--------|-------|
| 1438115_a_at | solute carrier family 9 (sodium/hydrogen exchanger) | BB805362  | 26941  | -1.84 |
| 1448471_a_at | cytotoxic T lymphocyte-associated protein 2 alpha   | NM_007796 | 13024  | -1.84 |
| 1425521_at   | polyadenylate binding protein-interacting protein 1 | BC019726  | 218693 | -1.85 |
| 1452240_at   | bruno-like 4, RNA binding protein (Drosophila)      | AV327653  | 108013 | -1.85 |
| 1427943_at   | acylphosphatase 2, muscle type                      | BI730288  | 75572  | -1.86 |
| 1448468_a_at | potassium voltage-gated channel, shaker-related s   | AF033003  | 16497  | -1.86 |
| 1422612_at   | hexokinase 2                                        | NM_013820 | 15277  | -1.87 |
| 1423072_at   | RIKEN cDNA 6720475J19 gene                          | AW549928  | 68157  | -1.87 |
| 1423585_at   | insulin-like growth factor binding protein 7        | AI481026  | 29817  | -1.87 |
| 1435695_a_at | RIKEN cDNA A030007L17 gene                          | AA673177  | 68252  | -1.88 |
| 1437548_at   | gb:AV367839 /DB_XREF=gi:16397715 /DB_XREF:          | AV367839  |        | -1.88 |
| 1449491_at   | caspase recruitment domain family, member 10        | NM_130859 | 105844 | -1.88 |
| 1451263_a_at | fatty acid binding protein 4, adipocyte             | BC002148  | 11770  | -1.88 |
| 1418393_a_at | integrin alpha 7                                    | NM_008398 | 16404  | -1.89 |
| 1418778_at   | RIKEN cDNA 9030408N13 gene                          | NM_025779 | 66815  | -1.89 |
| 1423500_a_at | SRY-box containing gene 5                           | AI528773  | 20678  | -1.89 |
| 1424967_x_at | troponin T2, cardiac                                | L47552    | 21956  | -1.89 |
| 1448182_a_at | CD24a antigen                                       | NM_009846 | 12484  | -1.89 |
| 1418004_a_at | RIKEN cDNA 1810009M01 gene                          | NM_023056 | 65963  | -1.9  |
| 1423471_at   | polypyrimidine tract binding protein 2              | BB076855  | 56195  | -1.9  |
| 1436272_at   | RIKEN cDNA 1110059F07 gene                          | BQ175872  | 98732  | -1.9  |
| 1451756_at   | FMS-like tyrosine kinase 1                          | D88690    | 14254  | -1.9  |
| 1416007_at   | special AT-rich sequence binding protein 1          | AV172776  | 20230  | -1.91 |
| 1416034_at   | CD24a antigen                                       | NM_009846 | 12484  | -1.92 |
| 1418726_a_at | troponin T2, cardiac                                | NM_011619 | 21956  | -1.93 |
| 1420411_a_at | phosphatidylinositol 4-kinase type 2 beta           | NM_028744 | 67073  | -1.93 |
| 1438476_a_at | chromodomain helicase DNA binding protein 4         | BB201828  | 107932 | -1.93 |
| 1428014_at   | histone 1, H4h                                      | BC028550  | 69386  | -1.94 |
| 1435162_at   | Protein kinase, cGMP-dependent, type II             | BB823350  | 19092  | -1.94 |
| 1429183_at   | plakophilin 2                                       | AK005020  | 67451  | -1.95 |
| 1447959_at   | zinc finger protein 398                             | AI506402  | 272347 | -1.95 |
| 1448961_at   | phospholipid scramblase 2                           | NM_008880 | 18828  | -1.95 |
| 1449187_at   | platelet derived growth factor, alpha               | BB371842  | 18590  | -1.95 |
| 1451612_at   | gb:BC027262.1 /DB_XREF=gi:20072672 /FEA=FL          | BC027262  |        | -1.96 |
| 1420872_at   | guanylate cyclase 1, soluble, beta 3                | BF472806  | 54195  | -1.98 |
| 1421153_at   | lysyl oxidase-like 4                                | NM_053083 | 67573  | -1.99 |
| 1423952_a_at | keratin complex 2, basic, gene 7                    | BC010337  | 110310 | -1.99 |
| 1416688_at   | synaptosomal-associated protein 91                  | NM_013669 | 20616  | -2    |
| 1417588_at   | UDP-N-acetyl-alpha-D-galactosamine:polypeptide l    | AK019995  | 14425  | -2    |
| 1420183_at   | loricrin                                            | AI036317  | 16939  | -2    |
| 1416008_at   | special AT-rich sequence binding protein 1          | AV172776  | 20230  | -2.01 |
| 1424890_at   | basonuclin 1                                        | U88064    | 12173  | -2.01 |
| 1418990_at   | membrane-spanning 4-domains, subfamily A, mem       | NM_025658 | 66607  | -2.02 |
| 1419437_at   | single-minded homolog 2 (Drosophila)                | D63383    | 20465  | -2.02 |
| 1421624_a_at | enabled homolog (Drosophila)                        | NM_010135 | 13800  | -2.02 |
| 1426243_at   | cystathionase (cystathionine gamma-lyase)           | BC019483  | 107869 | -2.02 |
| 1448942_at   | guanine nucleotide binding protein (G protein), gar | NM_025331 | 66066  | -2.02 |
| 1417262_at   | prostaglandin-endoperoxide synthase 2               | M94967    | 19225  | -2.03 |
| 1439368_a_at | solute carrier family 9 (sodium/hydrogen exchanger  | AV002797  | 65962  | -2.03 |
| 1455149_at   | SH3 multiple domains 2                              | BB072090  | 59009  | -2.03 |
| 1418494_at   | early B-cell factor 2                               | U71189    | 13592  | -2.06 |
| 1437502_x_at | CD24a antigen                                       | BB560574  | 12484  | -2.06 |
| 1448289_at   | collapsin response mediator protein 1               | AB006714  | 12933  | -2.08 |

|              |                                                         |           |        |       |
|--------------|---------------------------------------------------------|-----------|--------|-------|
| 1450329_a_at | arrestin 3, retinal                                     | NM_133205 | 170735 | -2.09 |
| 1448260_at   | ubiquitin carboxy-terminal hydrolase L1                 | NM_011670 | 22223  | -2.1  |
| 1418933_at   | solute carrier family 1 (high affinity aspartate/glutan | NM_009200 | 20513  | -2.11 |
| 1448664_a_at | Aortic preferentially expressed gene 1                  | NM_007463 | 11790  | -2.12 |
| 1424568_at   | gb:AV234585 /DB_XREF=gi:16386146 /DB_XREF:BC007185      |           |        | -2.13 |
| 1450140_a_at | cyclin-dependent kinase inhibitor 2A                    | NM_009877 | 12578  | -2.16 |
| 1427183_at   | epidermal growth factor-containing fibulin-like extra   | BC023060  | 216616 | -2.17 |
| 1454737_at   | dual specificity phosphatase 9                          | AV295798  | 75590  | -2.17 |
| 1422861_s_at | gb:NM_019808.1 /DB_XREF=gi:12083690 /GEN=E              | NM_019808 |        | -2.19 |
| 1425573_a_at | development and differentiation enhancing               | BE943736  | 13196  | -2.19 |
| 1435943_at   | Dipeptidase 1 (renal)                                   | AI647687  | 13479  | -2.19 |
| 1451527_at   | procollagen C-endopeptidase enhancer 2                  | AF352788  | 76477  | -2.2  |
| 1417220_at   | fumarylacetoacetate hydrolase                           | NM_010176 | 14085  | -2.21 |
| 1418486_at   | vanin 1                                                 | NM_011704 | 22361  | -2.21 |
| 1428955_x_at | solute carrier family 9 (sodium/hydrogen exchanger      | AK004710  | 65962  | -2.21 |
| 1452124_at   | RIKEN cDNA 2900054D09 gene                              | BB628935  | 73013  | -2.22 |
| 1418773_at   | fatty acid desaturase 3                                 | BE652876  | 60527  | -2.23 |
| 1422316_at   | glycoprotein 1b, alpha polypeptide                      | NM_010326 | 14723  | -2.23 |
| 1449823_at   | dachshund 2 (Drosophila)                                | NM_033605 | 93837  | -2.23 |
| 1420682_at   | cholinergic receptor, nicotinic, beta polypeptide 1 (n  | M14537    | 11443  | -2.24 |
| 1420992_at   | ankyrin repeat domain 1 (cardiac muscle)                | AK009959  | 107765 | -2.25 |
| 1416045_a_at | SWI/SNF related, matrix associated, actin depende       | NM_011418 | 20587  | -2.27 |
| 1451415_at   | RIKEN cDNA 1810011O10 gene                              | BC016562  | 69068  | -2.27 |
| 1418480_at   | chemokine (C-X-C motif) ligand 7                        | NM_023785 | 57349  | -2.28 |
| 1439369_x_at | solute carrier family 9 (sodium/hydrogen exchanger      | AV002797  | 65962  | -2.28 |
| 1417951_at   | enolase 3, beta muscle                                  | NM_007933 | 13808  | -2.29 |
| 1421825_at   | beta-site APP cleaving enzyme 1                         | AF200346  | 23821  | -2.29 |
| 1417542_at   | ribosomal protein S6 kinase, polypeptide 2              | BB737182  | 20112  | -2.3  |
| 1432517_a_at | nicotinamide N-methyltransferase                        | AK006371  | 18113  | -2.35 |
| 1444052_at   | FMS-like tyrosine kinase 4                              | AI323512  | 14257  | -2.35 |
| 1449799_s_at | plakophilin 2                                           | AA516617  | 67451  | -2.35 |
| 1449036_at   | ring finger protein 128                                 | AK004847  | 66889  | -2.38 |
| 1426731_at   | desmin                                                  | AI156158  | 13346  | -2.39 |
| 1426016_a_at | trophinin                                               | AF288606  | 56191  | -2.4  |
| 1418710_at   | CD59a antigen                                           | NM_007652 | 12509  | -2.41 |
| 1418945_at   | matrix metalloproteinase 3                              | NM_010809 | 17392  | -2.41 |
| 1434442_at   | DNA segment, Chr 5, ERATO Doi 593, expressed            | BB667844  | 52331  | -2.41 |
| 1422765_at   | microtubule-associated protein, RP/EB family, mem       | BM228525  | 13589  | -2.46 |
| 1416783_at   | gb:NM_009311.1 /DB_XREF=gi:6678206 /GEN=Ta              | NM_009311 |        | -2.49 |
| 1449328_at   | lymphocyte antigen 75                                   | NM_013825 | 17076  | -2.49 |
| 1438968_x_at | serine protease inhibitor, Kunitz type 2                | AV058358  | 20733  | -2.52 |
| 1424451_at   | 3-ketoacyl-CoA thiolase B                               | BC019882  | 235674 | -2.54 |
| 1418318_at   | ring finger protein 128                                 | AK004847  | 66889  | -2.55 |
| 1419534_at   | gb:NM_138648.1 /DB_XREF=gi:20149719 /GEN=C              | NM_138648 |        | -2.56 |
| 1449356_at   | ankyrin repeat and SOCs box-containing protein 5        | NM_029569 | 76294  | -2.62 |
| 1418497_at   | fibroblast growth factor 13                             | AF020737  | 14168  | -2.65 |
| 1419100_at   | serine (or cysteine) proteinase inhibitor, clade A, m   | NM_009252 | 20716  | -2.67 |
| 1448265_x_at | epithelial V-like antigen 1                             | BC015076  | 14012  | -2.71 |
| 1418569_at   | RIKEN cDNA 2410043F08 gene                              | BG070068  | 74202  | -2.72 |
| 1425092_at   | RIKEN cDNA A830016G23 gene                              | AF183946  | 320873 | -2.79 |
| 1420450_at   | matrix metalloproteinase 10                             | NM_019471 | 17384  | -2.89 |
| 1455158_at   | integrin alpha 3                                        | BI664675  | 16400  | -2.91 |
| 1448595_a_at | reduced expression 3                                    | NM_009052 | 19716  | -2.93 |

|              |                                                       |           |        |        |
|--------------|-------------------------------------------------------|-----------|--------|--------|
| 1417109_at   | lipocalin 7                                           | BC005738  | 94242  | -2.99  |
| 1422245_a_at | MRV integration site 1                                | U63408    | 17540  | -2.99  |
| 1421594_a_at | synaptotagmin-like 2                                  | NM_031394 | 83671  | -3.04  |
| 1448871_at   | mitogen activated protein kinase 13                   | NM_011950 | 26415  | -3.05  |
| 1421227_at   | granzyme E                                            | NM_010373 | 14942  | -3.07  |
| 1435493_at   | RIKEN cDNA 5730453H04 gene                            | AV297961  | 105072 | -3.09  |
| 1456747_x_at | MIC2 (monoclonal Imperial Cancer Research Fund        | BB334959  | 171486 | -3.2   |
| 1427735_a_at | actin, alpha 1, skeletal muscle                       | M12233    | 11459  | -3.22  |
| 1456746_a_at | gb:BB334959 /DB_XREF=gi:9043722 /DB_XREF=             | BB334959  |        | -3.28  |
| 1448926_at   | homeo box A5                                          | BC011063  | 15402  | -3.35  |
| 1419033_at   | RIKEN cDNA 2610018G03 gene                            | AW556821  | 70415  | -3.38  |
| 1448169_at   | keratin complex 1, acidic, gene 18                    | NM_010664 | 16668  | -3.4   |
| 1434325_x_at | protein kinase, cAMP dependent regulatory, type I     | BB274009  | 19085  | -3.66  |
| 1453208_at   | RIKEN cDNA 2700089E24 gene                            | AV030118  | 381820 | -3.67  |
| 1417130_s_at | angiopoietin-like 4                                   | NM_020581 | 57875  | -3.68  |
| 1418357_at   | forkhead box G1                                       | NM_008241 | 15228  | -4.23  |
| 1417466_at   | gb:NM_133736.1 /DB_XREF=gi:19526933 /GEN=1            | NM_133736 |        | -4.28  |
| 1435494_s_at | RIKEN cDNA 5730453H04 gene                            | AV297961  | 105072 | -4.34  |
| 1426225_at   | retinol binding protein 4, plasma                     | U63146    | 19662  | -4.36  |
| 1416676_at   | kininogen 1                                           | NM_023125 | 16644  | -4.41  |
| 1433783_at   | LIM domain binding 3                                  | BB479063  | 24131  | -4.5   |
| 1449965_at   | mast cell protease 8                                  | NM_008572 | 17231  | -4.69  |
| 1418547_at   | tissue factor pathway inhibitor 2                     | NM_009364 | 21789  | -5.24  |
| 1435856_x_at | gb:AV310148 /DB_XREF=gi:6363183 /DB_XREF=,            | AV310148  |        | -5.73  |
| 1425413_at   | regulatory factor X, 3 (influences HLA class II expre | BC017598  | 19726  | -6.29  |
| 1417256_at   | matrix metalloproteinase 13                           | NM_008607 | 17386  | -13.26 |
| 1436936_s_at | gb:BG806300 /DB_XREF=gi:17953245 /DB_XREF             | BG806300  |        | -20.68 |
| 1419195_at   | RIKEN cDNA 9230106L14 gene                            | NM_138685 | 192201 | -46.93 |
