# Supplementary material
Source: PubMed Central journal article supplement (PMC1308926)
Supplement: pnas_0509014102_3.pdf [file pnas_0509014102_3.pdf]

Table 3.

## MEF Snf5 up-regulated gene set

| Probe          | Gene symbol | Rank in database | Rank metric score | Res   |
|----------------|-------------|------------------|-------------------|-------|
| D78586_at      | CAD         | 5                | 1.313             | 0.009 |
| X06700_s_at    | COL3A1      | 9                | 1.268             | 0.018 |
| L21954_at      | BZRP        | 20               | 1.185             | 0.026 |
| L38969_at      | THBS3       | 22               | 1.163             | 0.034 |
| X66945_at      | FGFR1       | 36               | 1.033             | 0.040 |
| X79683_s_at    | LAMB2       | 39               | 1.024             | 0.047 |
| D45248_at      | PSME2       | 40               | 1.021             | 0.055 |
| D79997_at      | MELK        | 43               | 1.011             | 0.062 |
| Z25749_rna1_at | RPS7        | 44               | 1.010             | 0.070 |
| L38951_at      | KPNB1       | 45               | 1.008             | 0.077 |
| X74104_at      | SSR2        | 54               | 0.973             | 0.083 |
| J03191_at      | PFN1        | 57               | 0.962             | 0.090 |
| L41066_at      | NFATC4      | 58               | 0.961             | 0.098 |
| U29953_rna1_at | SERPINF1    | 60               | 0.944             | 0.104 |
| U48213_at      | DBP         | 61               | 0.936             | 0.111 |
| L41887_rna1_at | SFRS7       | 73               | 0.909             | 0.117 |
| U47926_at      | LEPREL2     | 84               | 0.888             | 0.122 |
| M25753_at      | CCNB1       | 123              | 0.834             | 0.122 |
| M36341_at      | ARF4        | 130              | 0.828             | 0.128 |
| M23114_at      | ATP2A2      | 144              | 0.816             | 0.132 |
| X07979_at      | ITGB1       | 149              | 0.807             | 0.137 |
| X74801_at      | CCT3        | 164              | 0.793             | 0.141 |
| Y00282_at      | RPN2        | 228              | 0.732             | 0.137 |
| M23294_at      | HEXB        | 248              | 0.717             | 0.140 |
| X59543_at      | RRM1        | 278              | 0.695             | 0.141 |
| M97936_at      | STAT1       | 285              | 0.688             | 0.145 |
| D13748_at      | EIF4A1      | 297              | 0.681             | 0.148 |
| U14603_at      | PTP4A2      | 301              | 0.677             | 0.153 |
| D78611_at      | MEST        | 302              | 0.677             | 0.158 |
| M22538_at      | NDUFV2      | 315              | 0.670             | 0.161 |
| Z69043_s_at    | SSR4        | 360              | 0.644             | 0.159 |
| S57235_at      | CD68        | 376              | 0.638             | 0.162 |
| J05032_at      | DARS        | 378              | 0.638             | 0.167 |
| U00954_at      | UGP2        | 399              | 0.629             | 0.168 |
| U38227_s_at    | HK1         | 402              | 0.627             | 0.173 |
| U79287_at      | PTOV1       | 410              | 0.623             | 0.176 |
| M94250_at      | MDK         | 411              | 0.623             | 0.181 |
| X62534_s_at    | HMGB2       | 436              | 0.614             | 0.182 |
| U37426_at      | KIF11       | 449              | 0.609             | 0.185 |
| J04058_at      | ETFA        | 468              | 0.601             | 0.186 |
| D13630_at      | BZW1        | 478              | 0.597             | 0.190 |
| M33308_at      | VCL         | 480              | 0.597             | 0.194 |
| U21128_at      | LUM         | 482              | 0.596             | 0.198 |
| S83365_at      | YIF1        | 488              | 0.594             | 0.202 |
| Z49835_s_at    | GRP58       | 489              | 0.594             | 0.206 |

|                  |          |      |       |       |
|------------------|----------|------|-------|-------|
| L07633_at        | PSME1    | 519  | 0.576 | 0.206 |
| D14660_at        | MRPL19   | 520  | 0.576 | 0.211 |
| U83601_at        | CAST     | 529  | 0.574 | 0.214 |
| X75755_rna1_s_at | SFRS2    | 535  | 0.571 | 0.217 |
| U81006_at        | TM9SF2   | 551  | 0.564 | 0.219 |
| M60858_rna1_at   | NCL      | 561  | 0.560 | 0.222 |
| L25080_at        | RHOA     | 566  | 0.558 | 0.226 |
| U37022_rna1_at   | CDK4     | 567  | 0.558 | 0.230 |
| D26579_at        | ADAM8    | 591  | 0.549 | 0.231 |
| M33195_at        | FCER1G   | 605  | 0.546 | 0.233 |
| M29064_at        | HNRPA2B1 | 606  | 0.546 | 0.237 |
| D63881_at        | JJAZ1    | 610  | 0.544 | 0.240 |
| D63874_at        | HMGB1    | 617  | 0.543 | 0.244 |
| M31627_at        | XBP1     | 640  | 0.536 | 0.244 |
| U30827_s_at      | SFRS5    | 661  | 0.530 | 0.245 |
| X14850_at        | H2AFX    | 677  | 0.523 | 0.247 |
| X69908_rna1_at   | ATP5G2   | 694  | 0.518 | 0.248 |
| U96915_at        | SAP18    | 716  | 0.512 | 0.249 |
| D55696_at        | LGMN     | 721  | 0.512 | 0.252 |
| J02923_at        | LCP1     | 726  | 0.511 | 0.256 |
| X83535_s_at      | MMP14    | 732  | 0.509 | 0.259 |
| M93425_at        | PTPN12   | 750  | 0.504 | 0.260 |
| U16660_at        | ECH1     | 756  | 0.502 | 0.263 |
| X66899_at        | EWSR1    | 760  | 0.501 | 0.266 |
| D14710_at        | ATP5A1   | 792  | 0.489 | 0.265 |
| D16480_at        | HADHA    | 816  | 0.482 | 0.265 |
| L06419_at        | PLOD     | 833  | 0.476 | 0.267 |
| X76105_at        | DAP      | 850  | 0.471 | 0.268 |
| M20681_at        | SLC2A3   | 864  | 0.466 | 0.269 |
| U19718_at        | MFAP2    | 877  | 0.463 | 0.271 |
| D83004_at        | UBE2N    | 916  | 0.454 | 0.269 |
| Z48481_at        | MMP14    | 922  | 0.453 | 0.271 |
| L10910_at        | RNPC2    | 934  | 0.451 | 0.273 |
| L13720_at        | GAS6     | 942  | 0.447 | 0.275 |
| X81479_at        | EMR1     | 948  | 0.445 | 0.278 |
| X15722_at        | GSR      | 959  | 0.443 | 0.280 |
| L37882_at        | FZD2     | 961  | 0.442 | 0.283 |
| U72621_at        | PLAGL1   | 966  | 0.440 | 0.286 |
| X05855_at        | H3F3A    | 980  | 0.438 | 0.287 |
| L14595_at        | SLC1A4   | 1005 | 0.431 | 0.286 |
| L28010_at        | HNRPF    | 1015 | 0.429 | 0.288 |
| L47276_s_at      | TOP2A    | 1031 | 0.423 | 0.289 |
| X62320_at        | GRN      | 1040 | 0.420 | 0.291 |
| Z14982_rna1_at   | PSMB8    | 1041 | 0.420 | 0.294 |
| M55267_at        | EVI2A    | 1051 | 0.418 | 0.296 |
| M37583_at        | H2AFZ    | 1061 | 0.415 | 0.298 |
| X89109_s_at      | CORO1A   | 1073 | 0.412 | 0.299 |
| M55542_at        | GBP1     | 1082 | 0.411 | 0.301 |
| M29927_at        | OAT      | 1089 | 0.408 | 0.303 |

|                |          |      |       |       |
|----------------|----------|------|-------|-------|
| M29550_at      | PPP3CB   | 1098 | 0.406 | 0.305 |
| M13690_s_at    | SERPING1 | 1107 | 0.404 | 0.307 |
| M60556_rna2_at | TGFB3    | 1138 | 0.397 | 0.306 |
| X66397_at      | TPR      | 1145 | 0.395 | 0.308 |
| U73379_at      | UBE2C    | 1162 | 0.390 | 0.308 |
| Y00097_s_at    | ANXA6    | 1165 | 0.389 | 0.311 |
| D16294_at      | ACAA2    | 1166 | 0.389 | 0.314 |
| U92014_at      | SEC31L1  | 1168 | 0.389 | 0.316 |
| D59253_at      | NCBP2    | 1173 | 0.387 | 0.319 |
| J00105_s_at    | B2M      | 1213 | 0.378 | 0.316 |
| M20777_at      | COL6A2   | 1245 | 0.371 | 0.314 |
| X17576_at      | NCK1     | 1254 | 0.368 | 0.315 |
| U08096_at      | PMP22    | 1259 | 0.367 | 0.318 |
| M19267_s_at    | TPM1     | 1266 | 0.366 | 0.319 |
| D38073_at      | MCM3     | 1298 | 0.358 | 0.317 |
| L09717_at      | LAMP2    | 1299 | 0.358 | 0.320 |
| L17075_s_at    | ACVRL1   | 1328 | 0.353 | 0.319 |
| X53742_at      | FBLN1    | 1337 | 0.352 | 0.320 |
| M24594_at      | IFIT1    | 1364 | 0.346 | 0.319 |
| X67325_at      | IFI27    | 1367 | 0.345 | 0.321 |
| U60205_at      | SC4MOL   | 1382 | 0.344 | 0.321 |
| X15882_at      | COL6A2   | 1426 | 0.335 | 0.317 |
| U27460_at      | UGP2     | 1448 | 0.332 | 0.317 |

### MEF Snf5 down-regulated gene set

| Probe       | Gene symbol | Rank in database | Rank metric score | Res   |
|-------------|-------------|------------------|-------------------|-------|
| M97287_at   | SATB1       | 7124             | -1.048            | 0.00  |
| U14187_at   | EFNA3       | 7115             | -0.901            | -0.03 |
| M25667_at   | GAP43       | 7052             | -0.747            | -0.05 |
| D78012_at   | CRMP1       | 7037             | -0.728            | -0.07 |
| U57099_at   | APEG1       | 7014             | -0.706            | -0.08 |
| S52028_s_at | CTH         | 6880             | -0.607            | -0.08 |
| X51435_s_at | HIVEP1      | 6818             | -0.582            | -0.09 |
| X69878_at   | FLT4        | 6797             | -0.569            | -0.11 |
| U57623_s_at | FABP3       | 6788             | -0.567            | -0.12 |
| M29277_at   | MCAM        | 6701             | -0.532            | -0.13 |
| L46353_at   | HMGA2       | 6630             | -0.506            | -0.13 |
| X85106_at   | RPS6KA2     | 6613             | -0.500            | -0.14 |
| S66541_s_at | GAP43       | 6569             | -0.484            | -0.15 |
| S77812_at   | FLT1        | 6522             | -0.469            | -0.16 |
| Z21488_at   | CNTN1       | 6492             | -0.459            | -0.17 |
| L77886_at   | PTPRK       | 6462             | -0.452            | -0.18 |
| U46901_at   | SNCA        | 6417             | -0.435            | -0.18 |
| U82108_s_at | SLC9A3R2    | 6282             | -0.395            | -0.18 |
| L36844_at   | CDKN2B      | 6219             | -0.380            | -0.18 |
| S66793_at   | ARR3        | 6146             | -0.367            | -0.18 |
| M17219_at   | GNAI1       | 6107             | -0.356            | -0.19 |

|                |          |      |        |       |
|----------------|----------|------|--------|-------|
| X74819_at      | TNNT2    | 6100 | -0.355 | -0.20 |
| D49410_at      | IL3RA    | 6092 | -0.353 | -0.21 |
| X94612_at      | PRKG2    | 6028 | -0.334 | -0.21 |
| U20428_at      | ST14     | 6001 | -0.327 | -0.21 |
| Y08302_at      | DUSP9    | 5949 | -0.316 | -0.21 |
| U88629_at      | ELL2     | 5938 | -0.313 | -0.22 |
| X65873_at      | KIF5B    | 5937 | -0.313 | -0.23 |
| M59216_s_at    | GABRB1   | 5891 | -0.304 | -0.23 |
| D83407_at      | DSCR1L1  | 5843 | -0.293 | -0.24 |
| L37360_s_at    | EFNA3    | 5800 | -0.283 | -0.24 |
| X92518_s_at    | HMGA2    | 5794 | -0.282 | -0.25 |
| D84110_at      | RBPMS    | 5745 | -0.273 | -0.25 |
| M59911_at      | ITGA3    | 5715 | -0.268 | -0.25 |
| D15050_at      | SNF1LK   | 5677 | -0.261 | -0.25 |
| M55150_at      | FAH      | 5654 | -0.257 | -0.26 |
| AC002450_at    | SLC25A13 | 5557 | -0.240 | -0.25 |
| M19989_cds2_at | PDGFA    | 5534 | -0.236 | -0.25 |
| X86691_at      | CHD4     | 5508 | -0.232 | -0.26 |
| M28882_s_at    | MCAM     | 5493 | -0.228 | -0.26 |
| U90878_at      | PDLIM1   | 5481 | -0.225 | -0.27 |
| L38503_at      | GSTT2    | 5469 | -0.224 | -0.27 |
| J05257_at      | DPEP1    | 5331 | -0.197 | -0.26 |
| X04741_at      | UCHL1    | 5320 | -0.196 | -0.26 |
| X74295_at      | ITGA7    | 5255 | -0.185 | -0.26 |
| M93426_at      | PTPRZ1   | 5248 | -0.184 | -0.26 |
| S83308_at      | SOX5     | 5171 | -0.174 | -0.26 |
| U09303_at      | EFNB1    | 5166 | -0.173 | -0.26 |
| D78014_at      | DPYSL3   | 5072 | -0.160 | -0.26 |
| X14767_at      | GABRB1   | 5019 | -0.154 | -0.25 |
| U80457_at      | SIM2     | 4976 | -0.148 | -0.25 |
| X68264_rna1_at | MCAM     | 4968 | -0.146 | -0.25 |
| M35198_at      | ITGB6    | 4949 | -0.144 | -0.26 |
| D42123_at      | CRIP2    | 4762 | -0.122 | -0.23 |
| D13626_at      | P2RY14   | 4760 | -0.122 | -0.24 |
| Z50194_at      | PHLDA1   | 4701 | -0.114 | -0.23 |
| U25034_s_at    | NNAT     | 4651 | -0.105 | -0.23 |
| M88338_at      | CDC42EP1 | 4647 | -0.104 | -0.23 |
| U66198_at      | FGF13    | 4550 | -0.089 | -0.22 |
| U18244_at      | SLC1A6   | 4538 | -0.088 | -0.22 |
| X05409_at      | ALDH2    | 4510 | -0.084 | -0.22 |
| L39833_at      | KCNAB1   | 4500 | -0.083 | -0.22 |
