# Supplementary material
Source: PubMed Central journal article supplement (PMC1308926)
Supplement: pnas_0509014102_4.pdf [file pnas_0509014102_4.pdf]

Table 4.

E2F target gene set

| Probe        | Gene symbol     | Rank in database | Rank metric score | Res   |
|--------------|-----------------|------------------|-------------------|-------|
| 1438320_s_at | Mcm7            | 127              | 0.982             | 0.031 |
| 1415945_at   | Mcm5            | 239              | 0.869             | 0.058 |
| 1426817_at   | Mki67           | 392              | 0.781             | 0.080 |
| 1417910_at   | Ccna2           | 409              | 0.774             | 0.108 |
| 1416031_s_at | Mcm7            | 451              | 0.760             | 0.135 |
| 1448777_at   | Mcm2            | 611              | 0.705             | 0.154 |
| 1416258_at   | Tk1             | 651              | 0.694             | 0.178 |
| 1416030_a_at | Mcm7            | 852              | 0.645             | 0.193 |
| 1452036_a_at | Tmpo            | 889              | 0.637             | 0.215 |
| 1421731_a_at | Fen1            | 1035             | 0.612             | 0.231 |
| 1425815_a_at | Hmmr            | 1052             | 0.609             | 0.253 |
| 1417911_at   | Ccna2           | 1076             | 0.603             | 0.275 |
| 1424321_at   | Rfc4            | 1211             | 0.581             | 0.290 |
| 1417947_at   | Pcna            | 1219             | 0.580             | 0.311 |
| 1438690_at   | Tyms-ps         | 1254             | 0.575             | 0.331 |
| 1416251_at   | Mcm6            | 1302             | 0.568             | 0.350 |
| 1422252_a_at | Cdc25c          | 1470             | 0.539             | 0.363 |
| 1431875_a_at | E2f1            | 1473             | 0.538             | 0.383 |
| 1424156_at   | Rbl1            | 1545             | 0.529             | 0.399 |
| 1415878_at   | Rrm1            | 1619             | 0.519             | 0.415 |
| 1426652_at   | Mcm3            | 1665             | 0.514             | 0.432 |
| 1423700_at   | Rfc3            | 1839             | 0.494             | 0.443 |
| 1434437_x_at | Rrm2            | 1976             | 0.482             | 0.455 |
| 1416415_a_at | H2afz           | 2219             | 0.457             | 0.461 |
| 1448226_at   | Rrm2            | 2223             | 0.456             | 0.478 |
| 1438161_s_at | Rfc4            | 2340             | 0.445             | 0.489 |
| 1425166_at   | Rbl1            | 2499             | 0.430             | 0.498 |
| 1454946_at   | Mybl2           | 2885             | 0.395             | 0.496 |
| 1436454_x_at | Fen1            | 2967             | 0.388             | 0.507 |
| 1425364_a_at | Slc3a2          | 2992             | 0.386             | 0.520 |
| 1420028_s_at | Mcm3            | 3012             | 0.384             | 0.533 |
| 1450156_a_at | Hmmr            | 3020             | 0.383             | 0.547 |
| 1428838_a_at | Dck             | 3032             | 0.383             | 0.561 |
| 1416873_a_at | Cdk2            | 3109             | 0.377             | 0.572 |
| 1426349_s_at | Tmpo            | 3470             | 0.348             | 0.569 |
| 1424991_s_at | Tyms-ps /// Tym | 3649             | 0.337             | 0.573 |
| 1416120_at   | Rrm2            | 3753             | 0.329             | 0.581 |
| 1417656_at   | Mybl2           | 3898             | 0.320             | 0.586 |
| 1426653_at   | Mcm3            | 4428             | 0.287             | 0.574 |
| 1417878_at   | E2f1            | 4473             | 0.284             | 0.582 |
| 1427541_x_at | Hmmr            | 4837             | 0.264             | 0.576 |
| 1415889_a_at | Tra1            | 4873             | 0.262             | 0.584 |
| 1434079_s_at | Mcm2            | 4987             | 0.256             | 0.589 |
| 1432538_a_at | Rfc3            | 5648             | 0.222             | 0.568 |
| 1438091_a_at | H2afz           | 5915             | 0.207             | 0.563 |
| 1449176_a_at | Dck             | 5960             | 0.206             | 0.569 |
| 1417019_a_at | Cdc6            | 6293             | 0.190             | 0.562 |
| 1448127_at   | Rrm1            | 6476             | 0.183             | 0.560 |

|              |        |       |        |       |
|--------------|--------|-------|--------|-------|
| 1422734_a_at | Myb    | 6501  | 0.181  | 0.566 |
| 1439269_x_at | Mcm7   | 6716  | 0.171  | 0.563 |
| 1416214_at   | Mcm4   | 6897  | 0.164  | 0.561 |
| 1419172_at   | Dhfr   | 7380  | 0.144  | 0.545 |
| 1460168_at   | Slbp   | 7815  | 0.126  | 0.530 |
| 1438852_x_at | Mcm6   | 7909  | 0.123  | 0.531 |
| 1439012_a_at | Dck    | 8461  | 0.101  | 0.510 |
| 1423511_at   | Asf1a  | 9117  | 0.076  | 0.484 |
| 1450194_a_at | Myb    | 9903  | 0.046  | 0.451 |
| 1421237_at   | Tmpo   | 9980  | 0.043  | 0.449 |
| 1437803_at   | null   | 10001 | 0.043  | 0.450 |
| 1456032_x_at | H2afz  | 11478 | -0.011 | 0.385 |
| 1416492_at   | Ccne1  | 13793 | -0.098 | 0.287 |
| 1427811_at   | Tyms   | 14604 | -0.130 | 0.256 |
| 1450157_a_at | Hmmr   | 14783 | -0.137 | 0.253 |
| 1436708_x_at | Mcm4   | 15901 | -0.183 | 0.210 |
| 1417132_at   | Cdc25a | 16102 | -0.192 | 0.208 |
| 1422663_at   | Orc1l  | 16160 | -0.194 | 0.213 |
| 1426020_at   | Tmpo   | 16577 | -0.213 | 0.203 |
| 1417850_at   | Rb1    | 17147 | -0.240 | 0.186 |
| 1421317_x_at | Myb    | 19541 | -0.375 | 0.095 |
| 1438040_a_at | Tra1   | 19585 | -0.378 | 0.107 |
| 1427462_at   | E2f3   | 20030 | -0.408 | 0.102 |
| 1417131_at   | Cdc25a | 20093 | -0.414 | 0.115 |
