# Supplementary material
Source: PubMed Central journal article supplement (PMC1308926)
Supplement: pnas_0509014102_5.pdf [file pnas_0509014102_5.pdf]

Table 5.

## Cyclin and CDK gene set

| Probe        | Gene symbol      | Rank in database | Rank metric score | Res   |
|--------------|------------------|------------------|-------------------|-------|
| 1450920_at   | Ccnb2            | 129              | 0.977             | 0.023 |
| 1448205_at   | Ccnb1-rs1//Ccnb1 | 338              | 0.805             | 0.038 |
| 1417910_at   | Ccna2            | 409              | 0.774             | 0.057 |
| 1416868_at   | Cdkn2c           | 419              | 0.770             | 0.080 |
| 1419943_s_at | Ccnb1            | 729              | 0.675             | 0.086 |
| 1452618_at   | Cdk5rap2         | 795              | 0.656             | 0.103 |
| 1417911_at   | Ccna2            | 1076             | 0.603             | 0.108 |
| 1420480_at   | Cnm3             | 1080             | 0.603             | 0.126 |
| 1416123_at   | Ccnd2            | 1139             | 0.591             | 0.140 |
| 1423475_at   | Cnm2             | 1240             | 0.577             | 0.153 |
| 1416488_at   | Ccng2            | 1290             | 0.569             | 0.168 |
| 1430127_a_at | Ccnd2            | 1448             | 0.542             | 0.177 |
| 1415907_at   | Ccnd3            | 1501             | 0.534             | 0.190 |
| 1423622_a_at | Ccnl1            | 1806             | 0.499             | 0.191 |
| 1416253_at   | Cdkn2d           | 1915             | 0.488             | 0.201 |
| 1422440_at   | Cdk4             | 1954             | 0.484             | 0.214 |
| 1422441_x_at | Cdk4             | 1979             | 0.481             | 0.227 |
| 1450674_at   | Cdk5             | 2377             | 0.442             | 0.222 |
| 1416122_at   | Ccnd2            | 2447             | 0.436             | 0.232 |
| 1448542_at   | Bccip            | 2487             | 0.431             | 0.243 |
| 1419313_at   | Ccnt1            | 2492             | 0.430             | 0.256 |
| 1422439_a_at | Cdk4             | 2797             | 0.403             | 0.254 |
| 1426885_a_at | Cdk2ap1          | 2863             | 0.397             | 0.263 |
| 1449675_at   | Ccnb1-rs1//Ccnb1 | 2871             | 0.396             | 0.274 |
| 1432195_s_at | Ccnl2            | 2882             | 0.395             | 0.285 |
| 1434745_at   | Ccnd2            | 3015             | 0.384             | 0.291 |
| 1416873_a_at | Cdk2             | 3109             | 0.377             | 0.298 |
| 1416076_at   | Ccnb1            | 3276             | 0.364             | 0.301 |
| 1422590_at   | Cdk5             | 3878             | 0.321             | 0.284 |
| 1424830_at   | Ccnk             | 4173             | 0.302             | 0.280 |
| 1434250_at   | Pak2             | 4234             | 0.298             | 0.286 |
| 1449229_a_at | Cdkl2            | 4286             | 0.295             | 0.293 |
| 1454144_a_at | Ccnc             | 4323             | 0.293             | 0.300 |
| 1426703_at   | Gak              | 4436             | 0.286             | 0.303 |
| 1418584_at   | Ccnh             | 4517             | 0.281             | 0.308 |
| 1422513_at   | Ccnf             | 5109             | 0.248             | 0.289 |
| 1448816_at   | Ptgis            | 5157             | 0.246             | 0.294 |
| 1420745_a_at | Ccndbp1          | 5291             | 0.239             | 0.295 |
| 1460291_at   | Cdk6             | 5520             | 0.229             | 0.292 |
| 1452047_at   | Cacybp           | 6061             | 0.201             | 0.274 |
| 1452307_at   | Cables2          | 6199             | 0.195             | 0.274 |
| 1448779_at   | Ciz1             | 7023             | 0.158             | 0.242 |
| 1421375_a_at | S100a6           | 7649             | 0.133             | 0.218 |
| 1427088_at   | Ccnt2            | 7736             | 0.129             | 0.218 |
| 1448239_at   | Hmox1            | 7751             | 0.129             | 0.221 |
| 1419497_at   | Cdkn1b           | 8411             | 0.103             | 0.195 |
| 1416427_at   | Ccni             | 8434             | 0.102             | 0.197 |
| 1453740_a_at | Ccnl2            | 8661             | 0.094             | 0.190 |

|              |          |       |        |        |
|--------------|----------|-------|--------|--------|
| 1421124_at   | Cdk5r1   | 9003  | 0.080  | 0.177  |
| 1435509_x_at | Cdk2ap1  | 9024  | 0.080  | 0.179  |
| 1433451_at   | Cdk5r1   | 9108  | 0.076  | 0.177  |
| 1448626_at   | Cdk5rap1 | 9147  | 0.075  | 0.178  |
| 1420980_at   | Pak1     | 10238 | 0.035  | 0.131  |
| 1456314_x_at | Cdk2ap1  | 10630 | 0.020  | 0.114  |
| 1448335_s_at | Ccni     | 11192 | -0.001 | 0.089  |
| 1448334_a_at | Ccni     | 11466 | -0.011 | 0.077  |
| 1448364_at   | Ccng2    | 12428 | -0.045 | 0.036  |
| 1423953_at   | Cdkal1   | 13250 | -0.077 | 0.002  |
| 1421679_a_at | Cdkn1a   | 13368 | -0.081 | -0.001 |
| 1416399_a_at | Hmox2    | 13370 | -0.081 | 0.002  |
| 1448229_s_at | Ccnd2    | 13431 | -0.084 | 0.002  |
| 1416492_at   | Ccne1    | 13793 | -0.098 | -0.012 |
| 1417269_at   | Cdk9     | 13963 | -0.105 | -0.016 |
| 1451741_a_at | Cdk7     | 14164 | -0.113 | -0.021 |
| 1456697_x_at | Dmtf1    | 14849 | -0.140 | -0.048 |
| 1450016_at   | Ccng1    | 15167 | -0.153 | -0.057 |
| 1455956_x_at | Ccnd2    | 15373 | -0.162 | -0.061 |
| 1427089_at   | Ccnt2    | 15616 | -0.171 | -0.067 |
| 1456293_s_at | Ccnh     | 15620 | -0.172 | -0.062 |
| 1451007_at   | Cnm2     | 16004 | -0.187 | -0.074 |
| 1450140_a_at | Cdkn2a   | 16612 | -0.215 | -0.094 |
| 1422636_at   | Dmtf1    | 16646 | -0.216 | -0.089 |
| 1449177_at   | Ccna1    | 17200 | -0.242 | -0.107 |
| 1454887_at   | Pak2     | 17335 | -0.249 | -0.105 |
| 1452297_at   | Ccnt2    | 17384 | -0.252 | -0.100 |
| 1454149_a_at | Ccnl2    | 17404 | -0.253 | -0.093 |
| 1427744_at   | Ccnb3    | 17567 | -0.261 | -0.093 |
| 1423067_at   | Cdk5rap3 | 18082 | -0.287 | -0.107 |
| 1450070_s_at | Pak1     | 18291 | -0.299 | -0.107 |
| 1426704_at   | Gak      | 18430 | -0.307 | -0.104 |
| 1455653_at   | Ccnj     | 18791 | -0.329 | -0.111 |
| 1416124_at   | Ccnd2    | 18997 | -0.341 | -0.110 |
| 1433450_at   | Cdk5r1   | 19020 | -0.342 | -0.100 |
| 1448698_at   | Ccnd1    | 19111 | -0.348 | -0.094 |
| 1424257_at   | Cdk7     | 19211 | -0.354 | -0.088 |
| 1417649_at   | Cdkn1c   | 19245 | -0.356 | -0.079 |
| 1417419_at   | Ccnd1    | 19373 | -0.363 | -0.074 |
| 1420483_at   | Cnm3     | 19696 | -0.384 | -0.077 |
| 1439164_at   | null     | 19704 | -0.385 | -0.066 |
| 1460389_at   | Cdk8     | 20016 | -0.407 | -0.068 |
| 1421123_at   | Cdk5r1   | 20071 | -0.412 | -0.058 |
| 1424638_at   | Cdkn1a   | 20146 | -0.419 | -0.049 |
| 1420979_at   | Pak1     | 20267 | -0.430 | -0.041 |
| 1421635_at   | Cnm4     | 20334 | -0.436 | -0.031 |
| 1417420_at   | Ccnd1    | 20524 | -0.453 | -0.026 |
| 1420354_at   | Cnm1     | 20801 | -0.482 | -0.024 |
| 1450465_at   | Cdk5r2   | 21109 | -0.518 | -0.023 |
| 1428570_at   | Ccnc     | 21331 | -0.544 | -0.016 |
| 1417923_at   | Pak3     | 21501 | -0.570 | -0.007 |
| 1449152_at   | Cdkn2b   | 22543 | -0.984 | -0.024 |
| 1418585_at   | Ccnh     | 22568 | -1.038 | 0.005  |
